# Supplementary material for: Metal–Halogen Bonding Seen through the Eyes of Vibrational Spectroscopy
Source: PubMed Central journal article supplement (PMC6982077; doi:10.3390/ma13010055), 2019-12-20
Supplement: materials-13-00055-s001.pdf [file materials-13-00055-s001.pdf]

Article

# Supplementary Material

## Metal halogen bonding - seen through the eyes of vibrational spectroscopy

Vytor P. Oliveira <sup>1</sup>  0000-0002-6614-7625, Bruna L. Marcial <sup>2</sup>  0000-0002-1014-7634, Francisco B. C. Machado <sup>1</sup>  0000-0002-2064-3463, and Elfi Kraka <sup>3,\*</sup>  0000-0002-9658-5626

<sup>1</sup> Affiliation 1; Instituto Tecnológico de Aeronáutica (ITA), Departamento de Química, São José dos Campos, 12228-900 São Paulo, Brazil; vytor3@gmail.com; fmachado@ita.br

<sup>2</sup> Affiliation 2; Instituto Federal Goiano (IFGoiano), Núcleo de Química, Campus Morrinhos, Goias, Brazil; bruna.marcial@ifgoiano.edu.br

<sup>3</sup> Affiliation 3; Department of Chemistry, Southern Methodist University, 3215 Daniel Avenue, Dallas, Texas 75275-0314, United States; ekraka@smu.edu;

\* Correspondence: ekraka@smu.edu; Tel.: +1-214-768-2611

Version December 7, 2019 submitted to Materials

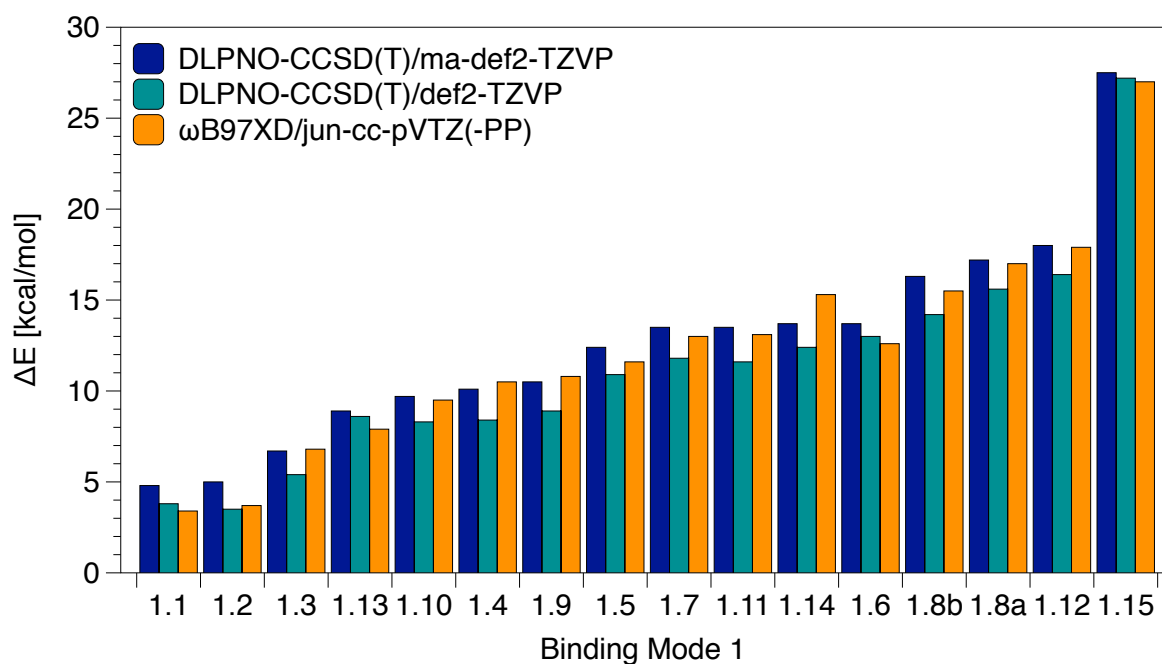

**Figure S1.** Ascendant ordering of binding energies obtained at different levels of theory for binding mode 1.

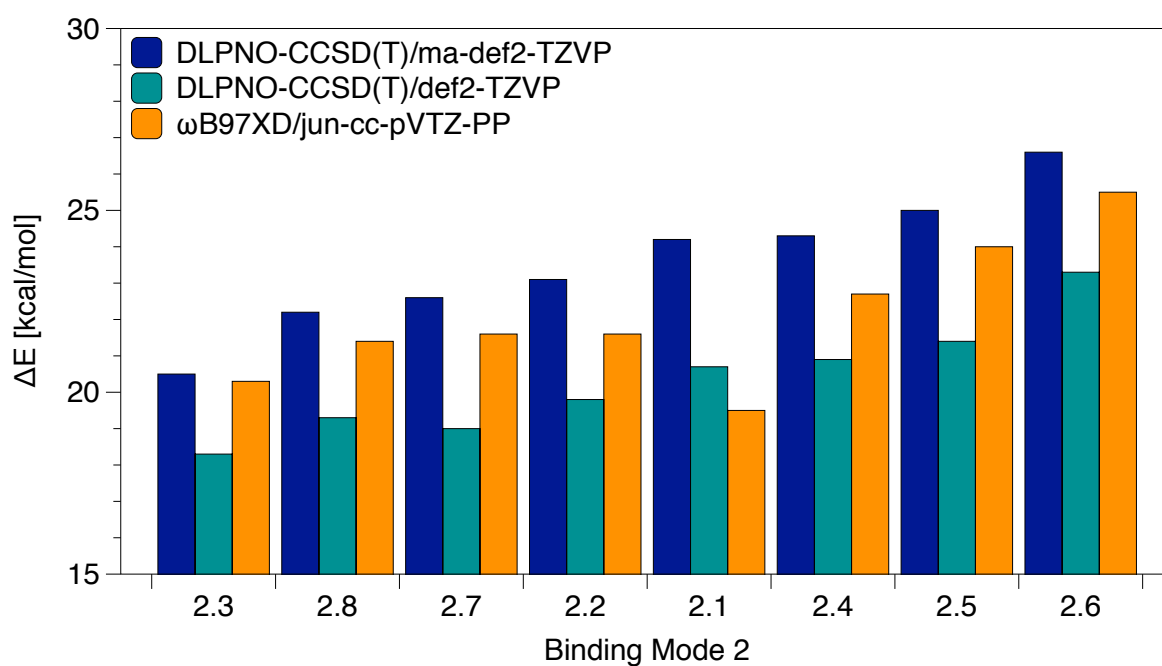

**Figure S2.** Ascendant ordering of binding energies obtained at different levels of theory for binding mode 2.

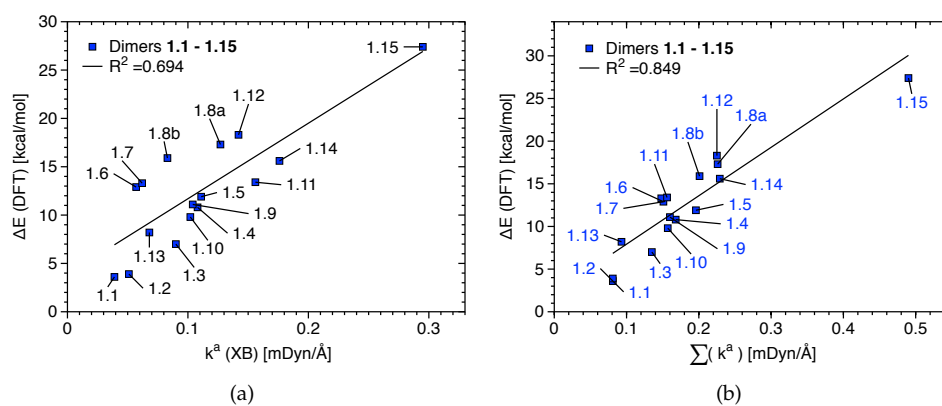

**Figure S3.** Relationship between binding energies in kcal/mol and the XB local stretching force constant ( $k^a$ (XB)) in mDYN/Å(a), including others contributions beyond XB (b). Only binding mode 1 dimers (1.1 - 1.15) were considered.

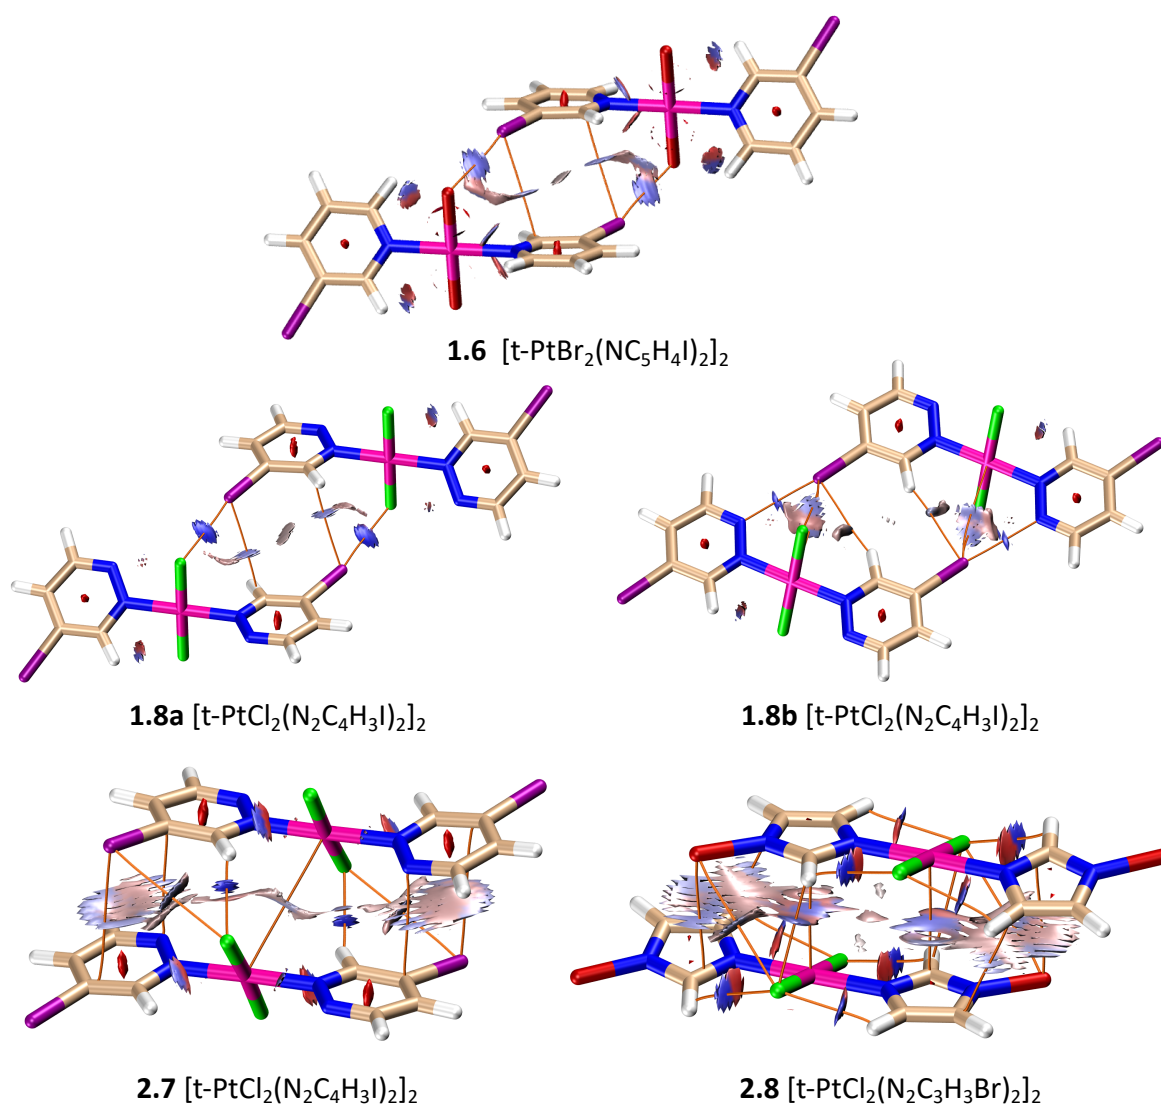

**Figure S4.** Colored RDG and bond paths. Dark blue regions indicate strong attractive interactions, light colors indicate dispersive interactions.

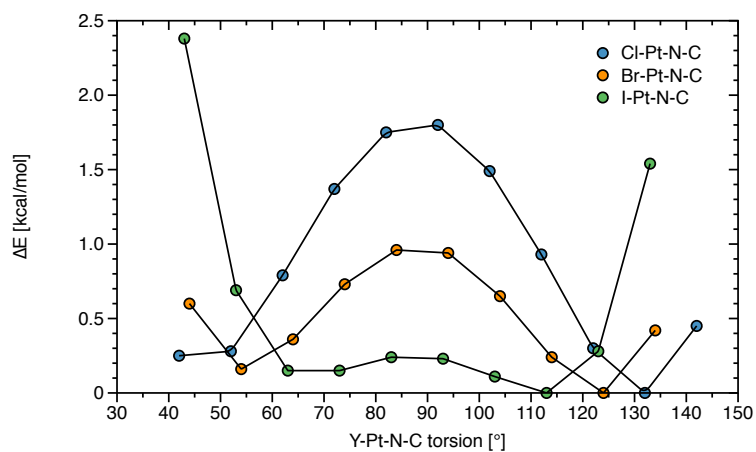

**Figure S5.** Relative energy increase associated with the torsion of the pyridine rings of dimers **1.4** (blue), **1.6** (orange), and **1.7** (green)

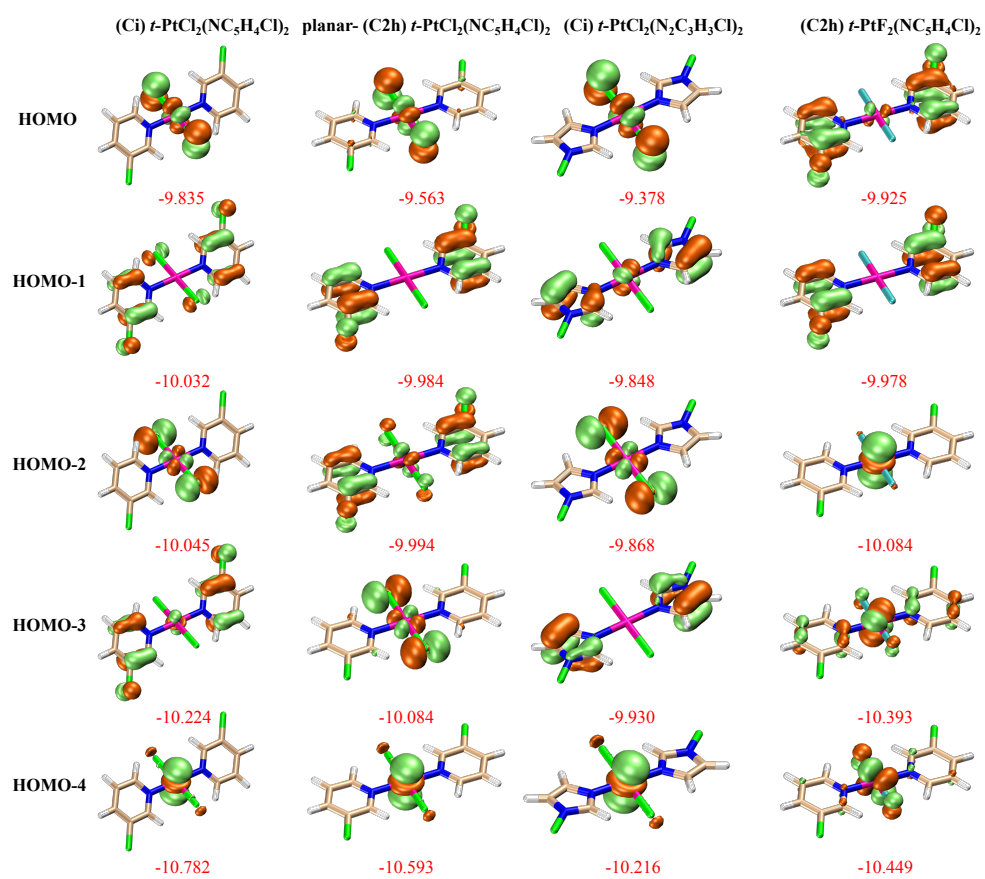

**Figure S6.** Selected molecular orbitals and orbital energies in eV. Calculated at HF/6-311g(d) with LANL2DZ ECP for Pt.

**Table S1.** Geometry, vibrational and topological properties of binding modes 2.

| #   | Dimer                                                                                              | Contact                                   | Type | r     | $k^a$ | BSO $n$ | $\rho_b$ | $H_b$ |
|-----|----------------------------------------------------------------------------------------------------|-------------------------------------------|------|-------|-------|---------|----------|-------|
| 2.1 | [t-PdCl <sub>2</sub> (NC <sub>5</sub> H <sub>4</sub> Cl) <sub>2</sub> ] <sub>2</sub>               | H...Cl                                    | HB   | 2.818 | 0.038 | 0.113   | 0.008    | 0.167 |
| 2.1 | [t-PdCl <sub>2</sub> (NC <sub>5</sub> H <sub>4</sub> Cl) <sub>2</sub> ] <sub>2</sub>               | H...Cl                                    | HB   | 2.800 | 0.048 | 0.128   | 0.008    | 0.172 |
| 2.1 | [t-PdCl <sub>2</sub> (NC <sub>5</sub> H <sub>4</sub> Cl) <sub>2</sub> ] <sub>2</sub>               | Pd...[Pd-Cl]                              | NS   | 3.525 | 0.170 | 0.259   | 0.045    | 0.003 |
| 2.1 | [t-PdCl <sub>2</sub> (NC <sub>5</sub> H <sub>4</sub> Cl) <sub>2</sub> ] <sub>2</sub>               | [C-Cl]...[C <sub>5</sub> N]               | NS   | 3.539 | 0.105 | 0.198   |          |       |
| 2.2 | [t-PtCl <sub>2</sub> (NC <sub>5</sub> H <sub>4</sub> Cl) <sub>2</sub> ] <sub>2</sub>               | H...Cl                                    | HB   | 2.886 | 0.040 | 0.116   | 0.007    | 0.143 |
| 2.2 | [t-PtCl <sub>2</sub> (NC <sub>5</sub> H <sub>4</sub> Cl) <sub>2</sub> ] <sub>2</sub>               | H...Cl                                    | HB   | 2.842 | 0.036 | 0.109   | 0.008    | 0.156 |
| 2.2 | [t-PtCl <sub>2</sub> (NC <sub>5</sub> H <sub>4</sub> Cl) <sub>2</sub> ] <sub>2</sub>               | Pt...[Pt-Cl]                              | NS   | 3.635 | 0.186 | 0.272   | 0.055    | 0.003 |
| 2.2 | [t-PtCl <sub>2</sub> (NC <sub>5</sub> H <sub>4</sub> Cl) <sub>2</sub> ] <sub>2</sub>               | [C-Cl]...[C <sub>5</sub> N]               | NS   | 3.513 | 0.133 | 0.226   |          |       |
| 2.3 | [t-PtCl <sub>2</sub> (NC <sub>5</sub> H <sub>4</sub> F) <sub>2</sub> ] <sub>2</sub>                | H...F                                     | HB   | 2.865 | 0.044 | 0.122   | 0.008    | 0.151 |
| 2.3 | [t-PtCl <sub>2</sub> (NC <sub>5</sub> H <sub>4</sub> F) <sub>2</sub> ] <sub>2</sub>                | H...F                                     | HB   | 2.874 | 0.046 | 0.125   | 0.007    | 0.146 |
| 2.3 | [t-PtCl <sub>2</sub> (NC <sub>5</sub> H <sub>4</sub> F) <sub>2</sub> ] <sub>2</sub>                | Pt...[Pt-Cl]                              | NS   | 3.638 | 0.195 | 0.279   | 0.055    | 0.003 |
| 2.3 | [t-PtCl <sub>2</sub> (NC <sub>5</sub> H <sub>4</sub> F) <sub>2</sub> ] <sub>2</sub>                | [C-Br]...[C <sub>5</sub> N]               | NS   | 3.359 | 0.100 | 0.193   |          |       |
| 2.4 | [t-PtCl <sub>2</sub> (NC <sub>5</sub> H <sub>4</sub> Br) <sub>2</sub> ] <sub>2</sub>               | H...Cl                                    | HB   | 2.854 | 0.036 | 0.109   | 0.007    | 0.151 |
| 2.4 | [t-PtCl <sub>2</sub> (NC <sub>5</sub> H <sub>4</sub> Br) <sub>2</sub> ] <sub>2</sub>               | H...Cl                                    | HB   | 2.872 | 0.043 | 0.121   | 0.007    | 0.147 |
| 2.4 | [t-PtCl <sub>2</sub> (NC <sub>5</sub> H <sub>4</sub> Br) <sub>2</sub> ] <sub>2</sub>               | Pt...[Pt-Cl]                              | NS   | 3.639 | 0.186 | 0.272   | 0.055    | 0.003 |
| 2.4 | [t-PtCl <sub>2</sub> (NC <sub>5</sub> H <sub>4</sub> Br) <sub>2</sub> ] <sub>2</sub>               | [C-Br]...[C <sub>5</sub> N]               | NS   | 3.581 | 0.149 | 0.241   |          |       |
| 2.5 | [t-PtCl <sub>2</sub> (NC <sub>5</sub> H <sub>4</sub> I) <sub>2</sub> ] <sub>2</sub>                | H...Cl                                    | HB   | 2.882 | 0.035 | 0.108   | 0.007    | 0.142 |
| 2.5 | [t-PtCl <sub>2</sub> (NC <sub>5</sub> H <sub>4</sub> I) <sub>2</sub> ] <sub>2</sub>                | H...Cl                                    | HB   | 2.846 | 0.037 | 0.111   | 0.008    | 0.156 |
| 2.5 | [t-PtCl <sub>2</sub> (NC <sub>5</sub> H <sub>4</sub> I) <sub>2</sub> ] <sub>2</sub>                | Pt...[Pt-Cl]                              | NS   | 3.650 | 0.187 | 0.273   | 0.054    | 0.003 |
| 2.5 | [t-PtCl <sub>2</sub> (NC <sub>5</sub> H <sub>4</sub> I) <sub>2</sub> ] <sub>2</sub>                | [C-I]...[C <sub>5</sub> N]                | NS   | 3.705 | 0.124 | 0.217   |          |       |
| 2.6 | [t-PtBr <sub>2</sub> (NC <sub>5</sub> H <sub>4</sub> I) <sub>2</sub> ] <sub>2</sub>                | H...Br                                    | HB   | 2.888 | 0.052 | 0.134   | 0.006    | 0.155 |
| 2.6 | [t-PtBr <sub>2</sub> (NC <sub>5</sub> H <sub>4</sub> I) <sub>2</sub> ] <sub>2</sub>                | H...Br                                    | HB   | 2.879 | 0.063 | 0.149   | 0.006    | 0.161 |
| 2.6 | [t-PtBr <sub>2</sub> (NC <sub>5</sub> H <sub>4</sub> I) <sub>2</sub> ] <sub>2</sub>                | Pt...[Pt-Br]                              | NS   | 3.780 | 0.169 | 0.258   | 0.043    | 0.003 |
| 2.6 | [t-PtBr <sub>2</sub> (NC <sub>5</sub> H <sub>4</sub> I) <sub>2</sub> ] <sub>2</sub>                | [C-I]...[C <sub>5</sub> N]                | NS   | 3.696 | 0.138 | 0.231   |          |       |
| 2.7 | [t-PtCl <sub>2</sub> (N <sub>2</sub> C <sub>4</sub> H <sub>3</sub> I) <sub>2</sub> ] <sub>2</sub>  | Cl...[C-H]                                | NS   | 2.972 | 0.140 | 0.232   |          |       |
| 2.7 | [t-PtCl <sub>2</sub> (N <sub>2</sub> C <sub>4</sub> H <sub>3</sub> I) <sub>2</sub> ] <sub>2</sub>  | [C-I]...[C <sub>3</sub> N <sub>2</sub> ]  | NS   | 3.549 | 0.138 | 0.231   |          |       |
| 2.8 | [t-PtCl <sub>2</sub> (N <sub>2</sub> C <sub>3</sub> H <sub>3</sub> Br) <sub>2</sub> ] <sub>2</sub> | Cl...H                                    | HB   | 2.983 | 0.056 | 0.140   |          |       |
| 2.8 | [t-PtCl <sub>2</sub> (N <sub>2</sub> C <sub>3</sub> H <sub>3</sub> Br) <sub>2</sub> ] <sub>2</sub> | [N-Br]...[C <sub>3</sub> N <sub>2</sub> ] | NS   | 3.503 | 0.093 | 0.185   |          |       |
| 2.8 | [t-PtCl <sub>2</sub> (N <sub>2</sub> C <sub>3</sub> H <sub>3</sub> Br) <sub>2</sub> ] <sub>2</sub> | Pt...[C <sub>3</sub> N <sub>2</sub> ]     | NS   | 3.510 | 0.139 | 0.231   |          |       |

<sup>a</sup>Atom-atom specific interaction are hydrogen bond HB; non-specific (NS) interaction involve the mid-point of a bond or a ring-plane (in brackets), r is the distance in Å involving atoms, mid-points or ring-planes, r(vdW) are the sum of Bondi radii of the closest two atoms. Local stretching force constant ( $k^a$ ) in mdyn/Å, density at the BCP ( $\rho_b$ ) in e/Å<sup>3</sup> and energy density at the BCP in Hartree/Å<sup>3</sup>.

**Table S2.** GEOMETRIES AT  $\omega$ B97XD/jun-cc-pVTZ(-PP)

| Dimers: 1.1 [t-PdCl <sub>2</sub> (NC <sub>5</sub> H <sub>4</sub> Cl) <sub>2</sub> ] <sub>2</sub> |           |        |        |         | Monomer: t-PdCl <sub>2</sub> (NC <sub>5</sub> H <sub>4</sub> Cl) <sub>2</sub> |        |        |        |  |
|--------------------------------------------------------------------------------------------------|-----------|--------|--------|---------|-------------------------------------------------------------------------------|--------|--------|--------|--|
| Index                                                                                            | Atom type | x      | y      | z       | Atom type                                                                     | x      | y      | z      |  |
| 1                                                                                                | C         | 0.643  | 3.125  | -3.682  | C                                                                             | -0.654 | -1.736 | 2.297  |  |
| 2                                                                                                | C         | 0.809  | 4.059  | -2.680  | C                                                                             | -0.800 | -2.119 | 3.614  |  |
| 3                                                                                                | C         | 0.491  | 3.722  | -1.378  | C                                                                             | -0.442 | -1.243 | 4.622  |  |
| 4                                                                                                | C         | 0.021  | 2.445  | -1.130  | C                                                                             | 0.045  | -0.002 | 4.258  |  |
| 5                                                                                                | C         | -0.105 | 1.547  | -2.172  | C                                                                             | 0.152  | 0.334  | 2.922  |  |
| 6                                                                                                | H         | 0.847  | 3.354  | -4.716  | H                                                                             | -0.890 | -2.400 | 1.480  |  |
| 7                                                                                                | H         | 1.177  | 5.043  | -2.926  | H                                                                             | -1.185 | -3.101 | 3.843  |  |
| 8                                                                                                | H         | 0.599  | 4.430  | -0.569  | H                                                                             | -0.536 | -1.512 | 5.664  |  |
| 9                                                                                                | H         | -0.442 | 0.536  | -2.005  | H                                                                             | 0.496  | 1.308  | 2.610  |  |
| 10                                                                                               | N         | 0.199  | 1.891  | -3.425  | N                                                                             | -0.189 | -0.528 | 1.963  |  |
| 11                                                                                               | Pd        | -0.018 | 0.546  | -4.938  | Pd                                                                            | 0.000  | 0.000  | 0.000  |  |
| 12                                                                                               | Cl        | 1.191  | -1.011 | -3.723  | Cl                                                                            | -1.002 | 2.035  | 0.453  |  |
| 13                                                                                               | Cl        | -1.203 | 2.115  | -6.151  | Cl                                                                            | 1.002  | -2.035 | -0.453 |  |
| 14                                                                                               | Cl        | -0.413 | 1.959  | 0.471   | C                                                                             | -0.152 | -0.334 | -2.922 |  |
| 15                                                                                               | C         | -0.032 | -0.428 | -7.721  | C                                                                             | 0.654  | 1.736  | -2.297 |  |
| 16                                                                                               | C         | -0.595 | -2.064 | -6.194  | C                                                                             | -0.045 | 0.002  | -4.258 |  |
| 17                                                                                               | C         | -0.166 | -1.323 | -8.765  | H                                                                             | -0.496 | -1.308 | -2.610 |  |
| 18                                                                                               | H         | 0.226  | 0.606  | -7.891  | C                                                                             | 0.800  | 2.119  | -3.614 |  |
| 19                                                                                               | C         | -0.762 | -2.997 | -7.197  | H                                                                             | 0.890  | 2.400  | -1.480 |  |
| 20                                                                                               | H         | -0.724 | -2.316 | -5.153  | C                                                                             | 0.442  | 1.243  | -4.622 |  |
| 21                                                                                               | C         | -0.541 | -2.629 | -8.511  | H                                                                             | 1.185  | 3.101  | -3.843 |  |
| 22                                                                                               | H         | -1.056 | -4.004 | -6.945  | H                                                                             | 0.536  | 1.512  | -5.664 |  |
| 23                                                                                               | H         | -0.656 | -3.334 | -9.322  | N                                                                             | 0.189  | 0.528  | -1.963 |  |
| 24                                                                                               | N         | -0.240 | -0.803 | -6.457  | Cl                                                                            | 0.520  | 1.151  | 5.458  |  |
| 25                                                                                               | Cl        | 0.135  | -0.785 | -10.381 | Cl                                                                            | -0.520 | -1.151 | -5.458 |  |
| 26                                                                                               | C         | -0.021 | -2.445 | 1.130   |                                                                               |        |        |        |  |
| 27                                                                                               | C         | 0.105  | -1.547 | 2.172   |                                                                               |        |        |        |  |
| 28                                                                                               | C         | -0.643 | -3.125 | 3.682   |                                                                               |        |        |        |  |
| 29                                                                                               | C         | -0.809 | -4.059 | 2.680   |                                                                               |        |        |        |  |
| 30                                                                                               | C         | -0.491 | -3.722 | 1.378   |                                                                               |        |        |        |  |
| 31                                                                                               | H         | 0.442  | -0.536 | 2.005   |                                                                               |        |        |        |  |
| 32                                                                                               | H         | -0.847 | -3.354 | 4.716   |                                                                               |        |        |        |  |
| 33                                                                                               | H         | -1.177 | -5.043 | 2.926   |                                                                               |        |        |        |  |
| 34                                                                                               | H         | -0.599 | -4.430 | 0.569   |                                                                               |        |        |        |  |
| 35                                                                                               | Pd        | 0.018  | -0.546 | 4.938   |                                                                               |        |        |        |  |
| 36                                                                                               | Cl        | -1.191 | 1.011  | 3.723   |                                                                               |        |        |        |  |
| 37                                                                                               | Cl        | 1.203  | -2.115 | 6.151   |                                                                               |        |        |        |  |
| 38                                                                                               | Cl        | 0.413  | -1.959 | -0.471  |                                                                               |        |        |        |  |
| 39                                                                                               | N         | -0.199 | -1.891 | 3.425   |                                                                               |        |        |        |  |
| 40                                                                                               | C         | 0.032  | 0.428  | 7.721   |                                                                               |        |        |        |  |
| 41                                                                                               | C         | 0.595  | 2.064  | 6.194   |                                                                               |        |        |        |  |
| 42                                                                                               | C         | 0.166  | 1.323  | 8.765   |                                                                               |        |        |        |  |
| 43                                                                                               | H         | -0.226 | -0.606 | 7.891   |                                                                               |        |        |        |  |
| 44                                                                                               | C         | 0.762  | 2.997  | 7.197   |                                                                               |        |        |        |  |
| 45                                                                                               | H         | 0.724  | 2.316  | 5.153   |                                                                               |        |        |        |  |

|    |    |        |       |        |
|----|----|--------|-------|--------|
| 46 | C  | 0.541  | 2.629 | 8.511  |
| 47 | H  | 1.056  | 4.004 | 6.945  |
| 48 | H  | 0.656  | 3.334 | 9.322  |
| 49 | N  | 0.240  | 0.803 | 6.457  |
| 50 | Cl | -0.135 | 0.785 | 10.381 |

Dimers:  $1.2 [t-PtCl_2(NC_5H_4Cl)_2]_2$ Monomer:  $t-PtCl_2(NC_5H_4Cl)_2$ 

| Index | Atom type | <i>x</i> | <i>y</i> | <i>z</i> | Atom type | <i>x</i> | <i>y</i> | <i>z</i> |
|-------|-----------|----------|----------|----------|-----------|----------|----------|----------|
| 1     | C         | 0.648    | 3.154    | -3.652   | C         | -0.657   | -1.734   | 2.288    |
| 2     | C         | 0.813    | 4.096    | -2.659   | C         | -0.800   | -2.116   | 3.606    |
| 3     | C         | 0.519    | 3.764    | -1.349   | C         | -0.442   | -1.241   | 4.614    |
| 4     | C         | 0.072    | 2.482    | -1.087   | C         | 0.047    | -0.001   | 4.249    |
| 5     | C         | -0.059   | 1.575    | -2.121   | C         | 0.157    | 0.335    | 2.915    |
| 6     | H         | 0.839    | 3.378    | -4.690   | H         | -0.901   | -2.395   | 1.472    |
| 7     | H         | 1.163    | 5.083    | -2.917   | H         | -1.187   | -3.097   | 3.834    |
| 8     | H         | 0.629    | 4.479    | -0.547   | H         | -0.536   | -1.509   | 5.656    |
| 9     | H         | -0.386   | 0.563    | -1.943   | H         | 0.509    | 1.306    | 2.603    |
| 10    | N         | 0.223    | 1.914    | -3.383   | N         | -0.188   | -0.526   | 1.952    |
| 11    | Pt        | -0.001   | 0.562    | -4.877   | Pt        | 0.000    | 0.000    | 0.000    |
| 12    | Cl        | 1.273    | -0.967   | -3.685   | Cl        | -1.032   | 2.027    | 0.448    |
| 13    | Cl        | -1.255   | 2.100    | -6.070   | Cl        | 1.032    | -2.027   | -0.448   |
| 14    | Cl        | -0.336   | 1.998    | 0.521    | C         | -0.157   | -0.335   | -2.915   |
| 15    | C         | -0.036   | -0.425   | -7.646   | C         | 0.657    | 1.734    | -2.288   |
| 16    | C         | -0.576   | -2.056   | -6.101   | C         | -0.047   | 0.001    | -4.249   |
| 17    | C         | -0.179   | -1.327   | -8.681   | H         | -0.509   | -1.306   | -2.603   |
| 18    | H         | 0.219    | 0.608    | -7.825   | C         | 0.800    | 2.116    | -3.606   |
| 19    | C         | -0.745   | -2.994   | -7.098   | H         | 0.901    | 2.395    | -1.472   |
| 20    | H         | -0.698   | -2.300   | -5.058   | C         | 0.442    | 1.241    | -4.614   |
| 21    | C         | -0.542   | -2.634   | -8.416   | H         | 1.187    | 3.097    | -3.834   |
| 22    | H         | -1.029   | -4.001   | -6.835   | H         | 0.536    | 1.509    | -5.656   |
| 23    | H         | -0.660   | -3.344   | -9.222   | N         | 0.188    | 0.526    | -1.952   |
| 24    | N         | -0.230   | -0.791   | -6.374   | Cl        | 0.523    | 1.152    | 5.448    |
| 25    | Cl        | 0.100    | -0.795   | -10.304  | Cl        | -0.523   | -1.152   | -5.448   |
| 26    | N         | 0.230    | 0.791    | 6.374    |           |          |          |          |
| 27    | C         | -0.072   | -2.482   | 1.087    |           |          |          |          |
| 28    | C         | 0.059    | -1.575   | 2.121    |           |          |          |          |
| 29    | C         | -0.648   | -3.154   | 3.652    |           |          |          |          |
| 30    | C         | -0.813   | -4.096   | 2.659    |           |          |          |          |
| 31    | C         | -0.519   | -3.764   | 1.349    |           |          |          |          |
| 32    | H         | 0.386    | -0.563   | 1.943    |           |          |          |          |
| 33    | H         | -0.839   | -3.378   | 4.690    |           |          |          |          |
| 34    | H         | -1.163   | -5.083   | 2.917    |           |          |          |          |
| 35    | H         | -0.629   | -4.479   | 0.547    |           |          |          |          |
| 36    | Pt        | 0.001    | -0.562   | 4.877    |           |          |          |          |
| 37    | Cl        | -1.273   | 0.967    | 3.685    |           |          |          |          |
| 38    | Cl        | 1.255    | -2.100   | 6.070    |           |          |          |          |
| 39    | Cl        | 0.336    | -1.998   | -0.521   |           |          |          |          |
| 40    | N         | -0.223   | -1.914   | 3.383    |           |          |          |          |
| 41    | C         | 0.036    | 0.425    | 7.646    |           |          |          |          |

|    |    |        |        |        |
|----|----|--------|--------|--------|
| 42 | C  | 0.576  | 2.056  | 6.101  |
| 43 | C  | 0.179  | 1.327  | 8.681  |
| 44 | H  | -0.219 | -0.608 | 7.825  |
| 45 | C  | 0.745  | 2.994  | 7.098  |
| 46 | H  | 0.698  | 2.300  | 5.058  |
| 47 | C  | 0.542  | 2.634  | 8.416  |
| 48 | H  | 1.029  | 4.001  | 6.835  |
| 49 | H  | 0.660  | 3.344  | 9.222  |
| 50 | Cl | -0.100 | 0.795  | 10.304 |

Dimers:  $1.3 [t\text{-PtCl}_2(\text{NC}_5\text{H}_4\text{Br})_2]_2$ Monomer:  $t\text{-PtCl}_2(\text{NC}_5\text{H}_4\text{Br})_2$ 

| Index | Atom type | <i>x</i> | <i>y</i> | <i>z</i> | Atom type | <i>x</i> | <i>y</i> | <i>z</i> |
|-------|-----------|----------|----------|----------|-----------|----------|----------|----------|
| 1     | C         | 0.035    | -1.684   | 2.049    | C         | 0.012    | 0.066    | -2.938   |
| 2     | C         | -0.702   | -3.278   | 3.549    | C         | -0.629   | -1.983   | -2.085   |
| 3     | C         | -0.852   | -4.206   | 2.540    | C         | -0.800   | -2.497   | -3.353   |
| 4     | C         | -0.535   | -3.857   | 1.240    | C         | -0.545   | -1.700   | -4.453   |
| 5     | H         | 0.371    | -0.671   | 1.895    | H         | 0.308    | 1.082    | -2.728   |
| 6     | H         | -0.911   | -3.515   | 4.580    | H         | -0.791   | -2.578   | -1.201   |
| 7     | H         | -1.208   | -5.196   | 2.780    | H         | -1.126   | -3.519   | -3.471   |
| 8     | H         | -0.635   | -4.566   | 0.431    | H         | -0.665   | -2.076   | -5.459   |
| 9     | Pt        | -0.066   | -0.700   | 4.812    | Pt        | 0.000    | 0.000    | 0.000    |
| 10    | N         | -0.271   | -2.035   | 3.303    | N         | -0.232   | -0.721   | -1.883   |
| 11    | C         | -0.007   | 0.249    | 7.595    | C         | -0.012   | -0.066   | 2.938    |
| 12    | C         | 0.455    | 1.915    | 6.064    | C         | 0.629    | 1.983    | 2.085    |
| 13    | H         | -0.229   | -0.794   | 7.760    | H         | -0.308   | -1.082   | 2.728    |
| 14    | C         | 0.616    | 2.845    | 7.070    | C         | 0.800    | 2.497    | 3.353    |
| 15    | H         | 0.552    | 2.178    | 5.023    | H         | 0.791    | 2.578    | 1.201    |
| 16    | C         | 0.449    | 2.460    | 8.387    | C         | 0.545    | 1.700    | 4.453    |
| 17    | H         | 0.867    | 3.863    | 6.816    | H         | 1.126    | 3.519    | 3.471    |
| 18    | H         | 0.563    | 3.167    | 9.196    | H         | 0.665    | 2.076    | 5.459    |
| 19    | N         | 0.151    | 0.638    | 6.325    | N         | 0.232    | 0.721    | 1.883    |
| 20    | Br        | 0.406    | -2.015   | -0.734   | Br        | 0.245    | 0.758    | -5.667   |
| 21    | C         | -0.079   | -2.574   | 0.999    | Br        | -0.245   | -0.758   | 5.667    |
| 22    | C         | 0.129    | 1.140    | 8.641    | C         | -0.130   | -0.401   | -4.229   |
| 23    | Cl        | -1.420   | 0.805    | 3.674    | C         | 0.130    | 0.401    | 4.229    |
| 24    | Cl        | 1.250    | -2.221   | 5.956    | Cl        | -1.186   | 1.905    | -0.585   |
| 25    | Br        | -0.123   | 0.526    | 10.405   | Cl        | 1.186    | -1.905   | 0.585    |
| 26    | C         | 0.702    | 3.278    | -3.549   |           |          |          |          |
| 27    | C         | 0.852    | 4.206    | -2.540   |           |          |          |          |
| 28    | C         | 0.535    | 3.857    | -1.240   |           |          |          |          |
| 29    | C         | -0.035   | 1.684    | -2.049   |           |          |          |          |
| 30    | H         | 0.911    | 3.515    | -4.580   |           |          |          |          |
| 31    | H         | 1.208    | 5.196    | -2.780   |           |          |          |          |
| 32    | H         | 0.635    | 4.566    | -0.431   |           |          |          |          |
| 33    | H         | -0.371   | 0.671    | -1.895   |           |          |          |          |
| 34    | N         | 0.271    | 2.035    | -3.303   |           |          |          |          |
| 35    | Pt        | 0.066    | 0.700    | -4.812   |           |          |          |          |
| 36    | C         | 0.007    | -0.249   | -7.595   |           |          |          |          |
| 37    | C         | -0.455   | -1.915   | -6.064   |           |          |          |          |



|    |    |        |        |         |
|----|----|--------|--------|---------|
| 38 | H  | 0.229  | 0.794  | -7.760  |
| 39 | C  | -0.616 | -2.845 | -7.070  |
| 40 | H  | -0.552 | -2.178 | -5.023  |
| 41 | C  | -0.449 | -2.460 | -8.387  |
| 42 | H  | -0.867 | -3.863 | -6.816  |
| 43 | H  | -0.563 | -3.167 | -9.196  |
| 44 | N  | -0.151 | -0.638 | -6.325  |
| 45 | Br | -0.406 | 2.015  | 0.734   |
| 46 | Br | 0.123  | -0.526 | -10.405 |
| 47 | C  | 0.079  | 2.574  | -0.999  |
| 48 | C  | -0.129 | -1.140 | -8.641  |
| 49 | Cl | 1.420  | -0.805 | -3.674  |
| 50 | Cl | -1.250 | 2.221  | -5.956  |

Dimers: 1.4 [t-PtCl<sub>2</sub>(NC<sub>5</sub>H<sub>4</sub>I)<sub>2</sub>]<sub>2</sub>Monomer: t-PtCl<sub>2</sub>(NC<sub>5</sub>H<sub>4</sub>I)<sub>2</sub>

| Index | Atom type | x      | y      | z       | Atom type | x      | y      | z      |
|-------|-----------|--------|--------|---------|-----------|--------|--------|--------|
| 1     | C         | 0.815  | 3.389  | -3.545  | C         | -0.033 | -0.095 | -2.937 |
| 2     | C         | 0.996  | 4.296  | -2.522  | C         | -0.571 | -2.120 | -1.963 |
| 3     | C         | 0.655  | 3.942  | -1.229  | C         | -0.739 | -2.709 | -3.198 |
| 4     | C         | -0.003 | 1.811  | -2.070  | C         | -0.536 | -1.961 | -4.344 |
| 5     | H         | 1.043  | 3.629  | -4.571  | H         | 0.221  | 0.941  | -2.780 |
| 6     | H         | 1.396  | 5.273  | -2.745  | H         | -0.693 | -2.672 | -1.045 |
| 7     | H         | 0.783  | 4.641  | -0.415  | H         | -1.022 | -3.749 | -3.256 |
| 8     | H         | -0.388 | 0.812  | -1.941  | H         | -0.656 | -2.404 | -5.322 |
| 9     | N         | 0.330  | 2.163  | -3.317  | Pt        | 0.000  | 0.000  | 0.000  |
| 10    | Pt        | 0.072  | 0.854  | -4.839  | N         | -0.227 | -0.833 | -1.837 |
| 11    | C         | -0.093 | -0.051 | -7.634  | C         | 0.033  | 0.095  | 2.937  |
| 12    | C         | -0.512 | -1.738 | -6.112  | C         | 0.571  | 2.120  | 1.963  |
| 13    | H         | 0.131  | 0.993  | -7.782  | H         | -0.221 | -0.941 | 2.780  |
| 14    | C         | -0.718 | -2.649 | -7.126  | C         | 0.739  | 2.709  | 3.198  |
| 15    | H         | -0.575 | -2.017 | -5.072  | H         | 0.693  | 2.672  | 1.045  |
| 16    | C         | -0.596 | -2.244 | -8.442  | C         | 0.536  | 1.961  | 4.344  |
| 17    | H         | -0.967 | -3.670 | -6.879  | H         | 1.022  | 3.749  | 3.256  |
| 18    | H         | -0.747 | -2.942 | -9.252  | H         | 0.656  | 2.404  | 5.322  |
| 19    | N         | -0.208 | -0.459 | -6.365  | N         | 0.227  | 0.833  | 1.837  |
| 20    | I         | -0.443 | 2.037  | 0.907   | I         | 0.161  | 0.581  | -5.870 |
| 21    | I         | -0.063 | -0.210 | -10.646 | I         | -0.161 | -0.581 | 5.870  |
| 22    | C         | 0.140  | 2.676  | -1.000  | C         | -0.173 | -0.633 | -4.203 |
| 23    | C         | -0.274 | -0.921 | -8.693  | C         | 0.173  | 0.633  | 4.203  |
| 24    | Cl        | 1.479  | -0.671 | -3.788  | Cl        | -1.274 | 1.818  | -0.668 |
| 25    | Cl        | -1.278 | 2.399  | -5.904  | Cl        | 1.274  | -1.818 | 0.668  |
| 26    | N         | 0.208  | 0.459  | 6.365   |           |        |        |        |
| 27    | I         | 0.443  | -2.037 | -0.907  |           |        |        |        |
| 28    | C         | 0.003  | -1.811 | 2.070   |           |        |        |        |
| 29    | C         | -0.815 | -3.389 | 3.545   |           |        |        |        |
| 30    | C         | -0.996 | -4.296 | 2.522   |           |        |        |        |
| 31    | C         | -0.655 | -3.942 | 1.229   |           |        |        |        |
| 32    | H         | 0.388  | -0.812 | 1.941   |           |        |        |        |
| 33    | H         | -1.043 | -3.629 | 4.571   |           |        |        |        |

|    |    |        |        |        |
|----|----|--------|--------|--------|
| 34 | H  | -1.396 | -5.273 | 2.745  |
| 35 | H  | -0.783 | -4.641 | 0.415  |
| 36 | Pt | -0.072 | -0.854 | 4.839  |
| 37 | N  | -0.330 | -2.163 | 3.317  |
| 38 | C  | 0.093  | 0.051  | 7.634  |
| 39 | C  | 0.512  | 1.738  | 6.112  |
| 40 | H  | -0.131 | -0.993 | 7.782  |
| 41 | C  | 0.718  | 2.649  | 7.126  |
| 42 | H  | 0.575  | 2.017  | 5.072  |
| 43 | C  | 0.596  | 2.244  | 8.442  |
| 44 | H  | 0.967  | 3.670  | 6.879  |
| 45 | H  | 0.747  | 2.942  | 9.252  |
| 46 | I  | 0.063  | 0.210  | 10.646 |
| 47 | C  | -0.140 | -2.676 | 1.000  |
| 48 | C  | 0.274  | 0.921  | 8.693  |
| 49 | Cl | -1.479 | 0.671  | 3.788  |
| 50 | Cl | 1.278  | -2.399 | 5.904  |

Dimers:  $1.5 [t\text{-PtF}_2(\text{NC}_5\text{H}_4\text{I})_2]_2$ Monomer:  $t\text{-PtF}_2(\text{NC}_5\text{H}_4\text{I})_2$ 

| Index | Atom type | <i>x</i> | <i>y</i> | <i>z</i> | Atom type | <i>x</i> | <i>y</i> | <i>z</i> |
|-------|-----------|----------|----------|----------|-----------|----------|----------|----------|
| 1     | C         | -2.406   | 3.938    | 1.468    | C         | 2.700    | 1.156    | 0.000    |
| 2     | C         | -3.368   | 3.078    | 1.952    | C         | 4.079    | 1.184    | 0.000    |
| 3     | C         | -3.336   | 1.741    | 1.592    | C         | 4.786    | -0.005   | 0.000    |
| 4     | C         | -2.339   | 1.308    | 0.734    | C         | 4.074    | -1.193   | 0.000    |
| 5     | C         | -1.416   | 2.226    | 0.266    | C         | 2.692    | -1.161   | 0.000    |
| 6     | H         | -2.373   | 4.989    | 1.714    | H         | 2.087    | 2.046    | 0.000    |
| 7     | H         | -4.131   | 3.456    | 2.616    | H         | 4.592    | 2.134    | 0.000    |
| 8     | H         | -4.072   | 1.049    | 1.977    | H         | 5.867    | -0.006   | 0.000    |
| 9     | H         | -0.617   | 1.953    | -0.405   | H         | 2.074    | -2.048   | 0.000    |
| 10    | N         | -1.442   | 3.511    | 0.641    | N         | 2.025    | 0.000    | 0.000    |
| 11    | Pt        | 0.003    | 4.786    | 0.013    | Pt        | 0.000    | 0.000    | 0.000    |
| 12    | I         | -2.121   | -0.698   | 0.176    | I         | 5.054    | -3.039   | 0.000    |
| 13    | C         | 1.316    | 7.385    | -0.331   | C         | -2.692   | 1.161    | 0.000    |
| 14    | C         | 2.514    | 5.639    | -1.270   | C         | -2.700   | -1.156   | 0.000    |
| 15    | C         | 2.276    | 8.295    | -0.733   | C         | -4.074   | 1.193    | 0.000    |
| 16    | H         | 0.420    | 7.662    | 0.207    | H         | -2.074   | 2.048    | 0.000    |
| 17    | C         | 3.501    | 6.502    | -1.696   | C         | -4.079   | -1.184   | 0.000    |
| 18    | H         | 2.543    | 4.573    | -1.445   | H         | -2.087   | -2.046   | 0.000    |
| 19    | C         | 3.390    | 7.854    | -1.427   | C         | -4.786   | 0.005    | 0.000    |
| 20    | H         | 4.351    | 6.112    | -2.235   | H         | -4.592   | -2.134   | 0.000    |
| 21    | H         | 4.153    | 8.547    | -1.751   | H         | -5.867   | 0.006    | 0.000    |
| 22    | N         | 1.442    | 6.079    | -0.599   | N         | -2.025   | 0.000    | 0.000    |
| 23    | I         | 2.019    | 10.319   | -0.280   | I         | -5.054   | 3.039    | 0.000    |
| 24    | F         | -1.066   | 6.300    | 0.682    | F         | 0.000    | 1.978    | 0.000    |
| 25    | F         | 1.100    | 3.270    | -0.665   | F         | 0.000    | -1.978   | 0.000    |
| 26    | N         | -1.442   | -6.079   | -0.599   |           |          |          |          |
| 27    | C         | 2.339    | -1.308   | 0.734    |           |          |          |          |
| 28    | C         | 1.416    | -2.226   | 0.266    |           |          |          |          |
| 29    | C         | 2.406    | -3.938   | 1.468    |           |          |          |          |

|    |    |        |         |        |
|----|----|--------|---------|--------|
| 30 | C  | 3.368  | -3.078  | 1.952  |
| 31 | C  | 3.336  | -1.741  | 1.592  |
| 32 | H  | 0.617  | -1.953  | -0.405 |
| 33 | H  | 2.373  | -4.989  | 1.714  |
| 34 | H  | 4.131  | -3.456  | 2.616  |
| 35 | H  | 4.072  | -1.049  | 1.977  |
| 36 | Pt | -0.003 | -4.786  | 0.013  |
| 37 | I  | 2.121  | 0.698   | 0.176  |
| 38 | N  | 1.442  | -3.511  | 0.641  |
| 39 | C  | -1.316 | -7.385  | -0.331 |
| 40 | C  | -2.514 | -5.639  | -1.270 |
| 41 | C  | -2.276 | -8.295  | -0.733 |
| 42 | H  | -0.420 | -7.662  | 0.207  |
| 43 | C  | -3.501 | -6.502  | -1.696 |
| 44 | H  | -2.543 | -4.573  | -1.445 |
| 45 | C  | -3.390 | -7.854  | -1.427 |
| 46 | H  | -4.351 | -6.112  | -2.235 |
| 47 | H  | -4.153 | -8.547  | -1.751 |
| 48 | I  | -2.019 | -10.319 | -0.280 |
| 49 | F  | -1.100 | -3.270  | -0.665 |
| 50 | F  | 1.066  | -6.300  | 0.682  |

Dimers:  $1.6 [t\text{-PtBr}_2(\text{NC}_5\text{H}_4\text{I})_2]_2$ Monomer:  $t\text{-PtBr}_2(\text{NC}_5\text{H}_4\text{I})_2$ 

| Index | Atom type | <i>x</i> | <i>y</i> | <i>z</i> | Atom type | <i>x</i> | <i>y</i> | <i>z</i> |
|-------|-----------|----------|----------|----------|-----------|----------|----------|----------|
| 1     | C         | 1.337    | 2.697    | -2.797   | C         | 1.081    | 1.915    | 1.958    |
| 2     | C         | 1.566    | 3.484    | -1.689   | C         | 1.368    | 2.460    | 3.192    |
| 3     | C         | 0.823    | 3.275    | -0.541   | C         | 0.925    | 1.825    | 4.337    |
| 4     | C         | -0.346   | 1.554    | -1.705   | C         | -0.039   | 0.147    | 2.934    |
| 5     | H         | 1.917    | 2.801    | -3.701   | H         | 1.388    | 2.390    | 1.040    |
| 6     | H         | 2.333    | 4.242    | -1.726   | H         | 1.932    | 3.379    | 3.248    |
| 7     | H         | 1.003    | 3.866    | 0.346    | H         | 1.134    | 2.236    | 5.314    |
| 8     | H         | -1.104   | 0.789    | -1.770   | H         | -0.574   | -0.776   | 2.781    |
| 9     | N         | 0.394    | 1.749    | -2.803   | N         | 0.391    | 0.776    | 1.834    |
| 10    | Pt        | 0.121    | 0.559    | -4.422   | Pt        | 0.000    | 0.000    | 0.000    |
| 11    | C         | -0.575   | -0.136   | -7.192   | C         | 0.039    | -0.147   | -2.934   |
| 12    | C         | 0.068    | -1.965   | -5.938   | C         | -1.081   | -1.915   | -1.958   |
| 13    | H         | -0.760   | 0.927    | -7.208   | H         | 0.574    | 0.776    | -2.781   |
| 14    | C         | -0.124   | -2.811   | -7.009   | C         | -1.368   | -2.460   | -3.192   |
| 15    | H         | 0.416    | -2.324   | -4.982   | H         | -1.388   | -2.390   | -1.040   |
| 16    | C         | -0.548   | -2.293   | -8.219   | C         | -0.925   | -1.825   | -4.337   |
| 17    | H         | 0.065    | -3.867   | -6.891   | H         | -1.932   | -3.379   | -3.248   |
| 18    | H         | -0.700   | -2.937   | -9.073   | H         | -1.134   | -2.236   | -5.314   |
| 19    | N         | -0.157   | -0.649   | -6.030   | N         | -0.391   | -0.776   | -1.834   |
| 20    | I         | -1.251   | 1.807    | 1.161    | I         | -0.512   | -0.385   | 5.864    |
| 21    | I         | -1.415   | -0.049   | -10.087  | I         | 0.512    | 0.385    | -5.864   |
| 22    | C         | -0.146   | 2.287    | -0.550   | C         | 0.206    | 0.650    | 4.198    |
| 23    | C         | -0.773   | -0.930   | -8.306   | C         | -0.206   | -0.650   | -4.198   |
| 24    | Br        | 2.448    | -0.229   | -4.232   | Br        | 1.040    | -2.117   | 0.675    |
| 25    | Br        | -2.192   | 1.330    | -4.597   | Br        | -1.040   | 2.117    | -0.675   |

|    |    |        |        |        |
|----|----|--------|--------|--------|
| 26 | N  | 0.157  | 0.649  | 6.030  |
| 27 | I  | 1.251  | -1.807 | -1.161 |
| 28 | C  | 0.346  | -1.554 | 1.705  |
| 29 | C  | -1.337 | -2.697 | 2.797  |
| 30 | C  | -1.566 | -3.484 | 1.689  |
| 31 | C  | -0.823 | -3.275 | 0.541  |
| 32 | H  | 1.104  | -0.789 | 1.770  |
| 33 | H  | -1.917 | -2.801 | 3.701  |
| 34 | H  | -2.333 | -4.242 | 1.726  |
| 35 | H  | -1.003 | -3.866 | -0.346 |
| 36 | Pt | -0.121 | -0.559 | 4.422  |
| 37 | N  | -0.394 | -1.749 | 2.803  |
| 38 | C  | 0.575  | 0.136  | 7.192  |
| 39 | C  | -0.068 | 1.965  | 5.938  |
| 40 | H  | 0.760  | -0.927 | 7.208  |
| 41 | C  | 0.124  | 2.811  | 7.009  |
| 42 | H  | -0.416 | 2.324  | 4.982  |
| 43 | C  | 0.548  | 2.293  | 8.219  |
| 44 | H  | -0.065 | 3.867  | 6.891  |
| 45 | H  | 0.700  | 2.937  | 9.073  |
| 46 | I  | 1.415  | 0.049  | 10.087 |
| 47 | C  | 0.146  | -2.287 | 0.550  |
| 48 | C  | 0.773  | 0.930  | 8.306  |
| 49 | Br | -2.448 | 0.229  | 4.232  |
| 50 | Br | 2.192  | -1.330 | 4.597  |

Dimers: 1.7 [t-PtI<sub>2</sub>(NC<sub>5</sub>H<sub>4</sub>I)<sub>2</sub>]<sub>2</sub>Monomer: t-PtI<sub>2</sub>(NC<sub>5</sub>H<sub>4</sub>I)<sub>2</sub>

| Index | Atom type | <i>x</i> | <i>y</i> | <i>z</i> | Atom type | <i>x</i> | <i>y</i> | <i>z</i> |
|-------|-----------|----------|----------|----------|-----------|----------|----------|----------|
| 1     | C         | 1.176    | 2.907    | -2.958   | C         | -0.671   | -2.605   | 1.200    |
| 2     | C         | 1.377    | 3.733    | -1.874   | C         | -0.885   | -3.542   | 2.188    |
| 3     | C         | 0.720    | 3.469    | -0.685   | C         | -0.689   | -3.193   | 3.512    |
| 4     | C         | -0.314   | 1.611    | -1.763   | C         | -0.102   | -1.002   | 2.760    |
| 5     | H         | 1.689    | 3.060    | -3.894   | H         | -0.795   | -2.841   | 0.155    |
| 6     | H         | 2.055    | 4.568    | -1.962   | H         | -1.197   | -4.539   | 1.916    |
| 7     | H         | 0.877    | 4.095    | 0.182    | H         | -0.846   | -3.912   | 4.302    |
| 8     | H         | -0.988   | 0.770    | -1.775   | H         | 0.192    | 0.020    | 2.937    |
| 9     | N         | 0.342    | 1.862    | -2.901   | N         | -0.289   | -1.355   | 1.484    |
| 10    | Pt        | 0.089    | 0.633    | -4.497   | Pt        | 0.000    | 0.000    | 0.000    |
| 11    | C         | -0.320   | -0.118   | -7.311   | C         | 0.102    | 1.002    | -2.760   |
| 12    | C         | -0.211   | -1.938   | -5.895   | C         | 0.671    | 2.605    | -1.200   |
| 13    | H         | -0.299   | 0.956    | -7.402   | H         | -0.192   | -0.020   | -2.937   |
| 14    | C         | -0.399   | -2.811   | -6.945   | C         | 0.885    | 3.542    | -2.188   |
| 15    | H         | -0.079   | -2.285   | -4.882   | H         | 0.795    | 2.841    | -0.155   |
| 16    | C         | -0.544   | -2.313   | -8.227   | C         | 0.689    | 3.193    | -3.512   |
| 17    | H         | -0.425   | -3.873   | -6.755   | H         | 1.197    | 4.539    | -1.916   |
| 18    | H         | -0.688   | -2.979   | -9.066   | H         | 0.846    | 3.912    | -4.302   |
| 19    | N         | -0.175   | -0.614   | -6.078   | N         | 0.289    | 1.355    | -1.484   |
| 20    | I         | -1.140   | 1.840    | 1.126    | I         | 0.035    | -1.269   | 5.760    |
| 21    | I         | -0.711   | -0.087   | -10.300  | I         | -0.035   | 1.269    | -5.760   |

|    |    |        |        |        |   |        |        |        |
|----|----|--------|--------|--------|---|--------|--------|--------|
| 22 | C  | -0.138 | 2.384  | -0.630 | C | -0.287 | -1.899 | 3.795  |
| 23 | C  | -0.500 | -0.941 | -8.407 | C | 0.287  | 1.899  | -3.795 |
| 24 | I  | 2.585  | -0.221 | -4.260 | I | -2.065 | 1.393  | 0.873  |
| 25 | I  | -2.393 | 1.469  | -4.754 | I | 2.065  | -1.393 | -0.873 |
| 26 | N  | 0.175  | 0.614  | 6.078  |   |        |        |        |
| 27 | I  | 1.140  | -1.840 | -1.126 |   |        |        |        |
| 28 | C  | 0.314  | -1.611 | 1.763  |   |        |        |        |
| 29 | C  | -1.176 | -2.907 | 2.958  |   |        |        |        |
| 30 | C  | -1.377 | -3.733 | 1.874  |   |        |        |        |
| 31 | C  | -0.720 | -3.469 | 0.685  |   |        |        |        |
| 32 | H  | 0.988  | -0.770 | 1.775  |   |        |        |        |
| 33 | H  | -1.689 | -3.060 | 3.894  |   |        |        |        |
| 34 | H  | -2.055 | -4.568 | 1.962  |   |        |        |        |
| 35 | H  | -0.877 | -4.095 | -0.182 |   |        |        |        |
| 36 | Pt | -0.089 | -0.633 | 4.497  |   |        |        |        |
| 37 | N  | -0.342 | -1.862 | 2.901  |   |        |        |        |
| 38 | C  | 0.320  | 0.118  | 7.311  |   |        |        |        |
| 39 | C  | 0.211  | 1.938  | 5.895  |   |        |        |        |
| 40 | H  | 0.299  | -0.956 | 7.402  |   |        |        |        |
| 41 | C  | 0.399  | 2.811  | 6.945  |   |        |        |        |
| 42 | H  | 0.079  | 2.285  | 4.882  |   |        |        |        |
| 43 | C  | 0.544  | 2.313  | 8.227  |   |        |        |        |
| 44 | H  | 0.425  | 3.873  | 6.755  |   |        |        |        |
| 45 | H  | 0.688  | 2.979  | 9.066  |   |        |        |        |
| 46 | I  | 0.711  | 0.087  | 10.300 |   |        |        |        |
| 47 | C  | 0.138  | -2.384 | 0.630  |   |        |        |        |
| 48 | C  | 0.500  | 0.941  | 8.407  |   |        |        |        |
| 49 | I  | -2.585 | 0.221  | 4.260  |   |        |        |        |
| 50 | I  | 2.393  | -1.469 | 4.754  |   |        |        |        |

Dimers: **1.8a** [t-PtCl<sub>2</sub>(N<sub>2</sub>C<sub>4</sub>H<sub>3</sub>I)<sub>2</sub>]<sub>2</sub>Monomer: t-PtCl<sub>2</sub>(N<sub>2</sub>C<sub>4</sub>H<sub>3</sub>I)<sub>2</sub>

| Index | Atom type | x      | y      | z      | Atom type | x      | y      | z      |
|-------|-----------|--------|--------|--------|-----------|--------|--------|--------|
| 1     | N         | 1.190  | 2.863  | -2.993 | N         | 1.883  | 2.100  | 1.065  |
| 2     | C         | 1.387  | 3.635  | -1.942 | C         | 2.349  | 3.334  | 1.065  |
| 3     | C         | 0.775  | 3.439  | -0.709 | C         | 1.675  | 4.418  | 0.515  |
| 4     | C         | -0.317 | 1.627  | -1.745 | C         | 0.000  | 2.850  | -0.055 |
| 5     | H         | 2.087  | 4.443  | -2.099 | H         | 3.316  | 3.454  | 1.533  |
| 6     | H         | 1.002  | 4.085  | 0.126  | H         | 2.102  | 5.409  | 0.549  |
| 7     | H         | -1.005 | 0.797  | -1.770 | H         | -0.934 | 2.550  | -0.503 |
| 8     | N         | 0.342  | 1.865  | -2.872 | N         | 0.712  | 1.879  | 0.511  |
| 9     | Pt        | 0.106  | 0.634  | -4.445 | Pt        | 0.000  | 0.000  | 0.522  |
| 10    | C         | -0.315 | -0.095 | -7.232 | C         | 0.000  | -2.850 | -0.055 |
| 11    | N         | -0.153 | -1.895 | -5.784 | N         | -1.883 | -2.100 | 1.065  |
| 12    | H         | -0.322 | 0.982  | -7.298 | H         | 0.934  | -2.550 | -0.503 |
| 13    | C         | -0.318 | -2.708 | -6.809 | C         | -2.349 | -3.334 | 1.065  |
| 14    | C         | -0.484 | -2.279 | -8.120 | C         | -1.675 | -4.418 | 0.515  |
| 15    | H         | -0.316 | -3.759 | -6.559 | H         | -3.316 | -3.454 | 1.533  |
| 16    | H         | -0.610 | -2.991 | -8.922 | H         | -2.102 | -5.409 | 0.549  |
| 17    | N         | -0.148 | -0.600 | -6.012 | N         | -0.712 | -1.879 | 0.511  |

|    |    |        |        |         |    |        |        |        |
|----|----|--------|--------|---------|----|--------|--------|--------|
| 18 | I  | -1.035 | 1.840  | 1.188   | I  | -0.694 | 5.653  | -0.952 |
| 19 | I  | -0.727 | -0.090 | -10.227 | I  | 0.694  | -5.653 | -0.952 |
| 20 | C  | -0.108 | 2.390  | -0.601  | C  | 0.457  | 4.160  | -0.067 |
| 21 | C  | -0.483 | -0.922 | -8.334  | C  | -0.457 | -4.160 | -0.067 |
| 22 | Cl | 2.137  | -0.384 | -3.941  | Cl | 0.000  | 0.000  | 2.831  |
| 23 | Cl | -1.911 | 1.655  | -4.939  | Cl | 0.000  | 0.000  | -1.805 |
| 24 | N  | 0.148  | 0.600  | 6.012   |    |        |        |        |
| 25 | I  | 1.035  | -1.840 | -1.188  |    |        |        |        |
| 26 | C  | 0.317  | -1.627 | 1.745   |    |        |        |        |
| 27 | N  | -1.190 | -2.863 | 2.993   |    |        |        |        |
| 28 | C  | -1.387 | -3.635 | 1.942   |    |        |        |        |
| 29 | C  | -0.775 | -3.439 | 0.709   |    |        |        |        |
| 30 | H  | 1.005  | -0.797 | 1.770   |    |        |        |        |
| 31 | H  | -2.087 | -4.443 | 2.099   |    |        |        |        |
| 32 | H  | -1.002 | -4.085 | -0.126  |    |        |        |        |
| 33 | Pt | -0.106 | -0.634 | 4.445   |    |        |        |        |
| 34 | N  | -0.342 | -1.865 | 2.872   |    |        |        |        |
| 35 | C  | 0.315  | 0.095  | 7.232   |    |        |        |        |
| 36 | N  | 0.153  | 1.895  | 5.784   |    |        |        |        |
| 37 | H  | 0.322  | -0.982 | 7.298   |    |        |        |        |
| 38 | C  | 0.318  | 2.708  | 6.809   |    |        |        |        |
| 39 | C  | 0.484  | 2.279  | 8.120   |    |        |        |        |
| 40 | H  | 0.316  | 3.759  | 6.559   |    |        |        |        |
| 41 | H  | 0.610  | 2.991  | 8.922   |    |        |        |        |
| 42 | I  | 0.727  | 0.090  | 10.227  |    |        |        |        |
| 43 | C  | 0.108  | -2.390 | 0.601   |    |        |        |        |
| 44 | C  | 0.483  | 0.922  | 8.334   |    |        |        |        |
| 45 | Cl | -2.137 | 0.384  | 3.941   |    |        |        |        |
| 46 | Cl | 1.911  | -1.655 | 4.939   |    |        |        |        |

Dimers: **1.8b** [t-PtCl<sub>2</sub>(N<sub>2</sub>C<sub>4</sub>H<sub>3</sub>I)<sub>2</sub>]<sub>2</sub>

| Index | Atom type | <i>x</i> | <i>y</i> | <i>z</i> |
|-------|-----------|----------|----------|----------|
| 1     | N         | 2.759    | 3.805    | 0.302    |
| 2     | C         | 1.784    | 4.695    | 0.292    |
| 3     | C         | 0.436    | 4.370    | 0.198    |
| 4     | C         | 1.167    | 2.131    | 0.154    |
| 5     | H         | 2.110    | 5.723    | 0.358    |
| 6     | H         | -0.316   | 5.145    | 0.182    |
| 7     | H         | 1.020    | 1.063    | 0.117    |
| 8     | N         | 2.430    | 2.535    | 0.230    |
| 9     | Pt        | 3.892    | 1.160    | 0.216    |
| 10    | C         | 6.594    | 0.081    | 0.037    |
| 11    | N         | 4.931    | -1.511   | 0.262    |
| 12    | H         | 6.793    | 1.137    | -0.059   |
| 13    | C         | 5.851    | -2.454   | 0.229    |
| 14    | C         | 7.212    | -2.201   | 0.110    |
| 15    | H         | 5.471    | -3.464   | 0.302    |
| 16    | H         | 7.925    | -3.012   | 0.094    |
| 17    | N         | 5.315    | -0.255   | 0.173    |

|    |    |        |        |        |
|----|----|--------|--------|--------|
| 18 | I  | -1.837 | 2.326  | -0.069 |
| 19 | I  | 9.582  | -0.312 | -0.193 |
| 20 | C  | 0.113  | 3.035  | 0.124  |
| 21 | C  | 7.592  | -0.885 | 0.007  |
| 22 | Cl | 3.242  | 0.490  | 2.338  |
| 23 | Cl | 4.573  | 1.851  | -1.888 |
| 24 | N  | -5.315 | 0.255  | -0.173 |
| 25 | I  | 1.837  | -2.326 | 0.069  |
| 26 | C  | -1.167 | -2.131 | -0.154 |
| 27 | N  | -2.759 | -3.805 | -0.302 |
| 28 | C  | -1.784 | -4.695 | -0.292 |
| 29 | C  | -0.436 | -4.370 | -0.198 |
| 30 | H  | -1.020 | -1.063 | -0.117 |
| 31 | H  | -2.110 | -5.723 | -0.358 |
| 32 | H  | 0.316  | -5.145 | -0.182 |
| 33 | Pt | -3.892 | -1.160 | -0.216 |
| 34 | N  | -2.430 | -2.535 | -0.230 |
| 35 | C  | -6.594 | -0.081 | -0.037 |
| 36 | N  | -4.931 | 1.511  | -0.262 |
| 37 | H  | -6.793 | -1.137 | 0.059  |
| 38 | C  | -5.851 | 2.454  | -0.229 |
| 39 | C  | -7.212 | 2.201  | -0.110 |
| 40 | H  | -5.471 | 3.464  | -0.302 |
| 41 | H  | -7.925 | 3.012  | -0.094 |
| 42 | I  | -9.582 | 0.312  | 0.193  |
| 43 | C  | -0.113 | -3.035 | -0.124 |
| 44 | C  | -7.592 | 0.885  | -0.007 |
| 45 | Cl | -3.242 | -0.490 | -2.338 |
| 46 | Cl | -4.573 | -1.851 | 1.888  |

Dimers: **1.9** [t-PtCl<sub>2</sub>(N<sub>2</sub>C<sub>4</sub>H<sub>3</sub>I)<sub>2</sub>]<sub>2</sub>Monomer: t-PtCl<sub>2</sub>(N<sub>2</sub>C<sub>4</sub>H<sub>3</sub>I)<sub>2</sub>

| Index | Atom type | x      | y      | z      | Atom type | x      | y      | z      |
|-------|-----------|--------|--------|--------|-----------|--------|--------|--------|
| 1     | C         | 0.791  | 3.345  | -3.524 | C         | 2.004  | 2.093  | -0.573 |
| 2     | N         | 0.985  | 4.221  | -2.563 | N         | 3.167  | 2.684  | -0.746 |
| 3     | C         | 0.649  | 3.866  | -1.328 | C         | 4.263  | 1.966  | -0.533 |
| 4     | C         | -0.044 | 1.751  | -2.102 | C         | 2.944  | 0.078  | -0.001 |
| 5     | H         | 1.037  | 3.623  | -4.538 | H         | 1.103  | 2.667  | -0.720 |
| 6     | H         | 0.814  | 4.600  | -0.548 | H         | 5.213  | 2.466  | -0.675 |
| 7     | H         | -0.440 | 0.755  | -1.976 | H         | 2.793  | -0.957 | 0.266  |
| 8     | N         | 0.297  | 2.113  | -3.342 | N         | 1.845  | 0.811  | -0.211 |
| 9     | Pt        | 0.059  | 0.835  | -4.893 | Pt        | 0.000  | 0.000  | 0.000  |
| 10    | C         | -0.048 | -0.020 | -7.712 | C         | -2.944 | -0.078 | 0.002  |
| 11    | C         | -0.533 | -1.722 | -6.251 | C         | -2.004 | -2.093 | 0.573  |
| 12    | H         | 0.199  | 1.021  | -7.851 | H         | -2.793 | 0.957  | -0.266 |
| 13    | N         | -0.735 | -2.603 | -7.207 | N         | -3.167 | -2.684 | 0.747  |
| 14    | H         | -0.636 | -2.040 | -5.224 | H         | -1.103 | -2.667 | 0.720  |
| 15    | C         | -0.579 | -2.198 | -8.461 | C         | -4.263 | -1.966 | 0.533  |
| 16    | H         | -0.744 | -2.934 | -9.239 | H         | -5.213 | -2.466 | 0.675  |
| 17    | N         | -0.198 | -0.440 | -6.451 | N         | -1.845 | -0.811 | 0.211  |

|    |    |        |        |         |    |        |        |        |
|----|----|--------|--------|---------|----|--------|--------|--------|
| 18 | I  | -0.442 | 2.046  | 0.890   | I  | 5.914  | -0.493 | 0.195  |
| 19 | I  | 0.023  | -0.254 | -10.733 | I  | -5.914 | 0.493  | -0.195 |
| 20 | C  | 0.113  | 2.621  | -1.041  | C  | 4.197  | 0.637  | -0.146 |
| 21 | C  | -0.225 | -0.894 | -8.766  | C  | -4.197 | -0.637 | 0.146  |
| 22 | Cl | 1.390  | -0.739 | -3.818  | Cl | 0.686  | -1.849 | -1.215 |
| 23 | Cl | -1.216 | 2.421  | -5.982  | Cl | -0.686 | 1.849  | 1.215  |
| 24 | N  | 0.198  | 0.440  | 6.451   |    |        |        |        |
| 25 | I  | 0.442  | -2.046 | -0.890  |    |        |        |        |
| 26 | C  | 0.044  | -1.751 | 2.102   |    |        |        |        |
| 27 | C  | -0.791 | -3.345 | 3.524   |    |        |        |        |
| 28 | N  | -0.985 | -4.221 | 2.563   |    |        |        |        |
| 29 | C  | -0.649 | -3.866 | 1.328   |    |        |        |        |
| 30 | H  | 0.440  | -0.755 | 1.976   |    |        |        |        |
| 31 | H  | -1.037 | -3.623 | 4.538   |    |        |        |        |
| 32 | H  | -0.814 | -4.600 | 0.548   |    |        |        |        |
| 33 | Pt | -0.059 | -0.835 | 4.893   |    |        |        |        |
| 34 | N  | -0.297 | -2.113 | 3.342   |    |        |        |        |
| 35 | C  | 0.048  | 0.020  | 7.712   |    |        |        |        |
| 36 | C  | 0.533  | 1.722  | 6.251   |    |        |        |        |
| 37 | H  | -0.199 | -1.021 | 7.851   |    |        |        |        |
| 38 | N  | 0.735  | 2.603  | 7.207   |    |        |        |        |
| 39 | H  | 0.636  | 2.040  | 5.224   |    |        |        |        |
| 40 | C  | 0.579  | 2.198  | 8.461   |    |        |        |        |
| 41 | H  | 0.744  | 2.934  | 9.239   |    |        |        |        |
| 42 | I  | -0.023 | 0.254  | 10.733  |    |        |        |        |
| 43 | C  | -0.113 | -2.621 | 1.041   |    |        |        |        |
| 44 | C  | 0.225  | 0.894  | 8.766   |    |        |        |        |
| 45 | Cl | -1.390 | 0.739  | 3.818   |    |        |        |        |
| 46 | Cl | 1.216  | -2.421 | 5.982   |    |        |        |        |

Dimers: **1.10** [t-PtCl<sub>2</sub>(N<sub>2</sub>C<sub>4</sub>H<sub>3</sub>I)<sub>2</sub>]<sub>2</sub>Monomer: t-PtCl<sub>2</sub>(N<sub>2</sub>C<sub>4</sub>H<sub>3</sub>I)<sub>2</sub>

| Index | Atom type | x      | y      | z      | Atom type | x      | y      | z      |
|-------|-----------|--------|--------|--------|-----------|--------|--------|--------|
| 1     | C         | 0.794  | 3.372  | -3.542 | C         | -0.069 | -0.071 | -2.937 |
| 2     | C         | 0.957  | 4.234  | -2.478 | C         | -0.632 | -2.082 | -1.987 |
| 3     | N         | 0.646  | 3.896  | -1.231 | C         | -0.813 | -2.609 | -3.248 |
| 4     | C         | 0.015  | 1.778  | -2.090 | N         | -0.619 | -1.895 | -4.352 |
| 5     | H         | 1.017  | 3.653  | -4.558 | H         | 0.208  | 0.962  | -2.803 |
| 6     | H         | 1.345  | 5.231  | -2.639 | H         | -0.762 | -2.665 | -1.089 |
| 7     | H         | -0.355 | 0.778  | -1.934 | H         | -1.120 | -3.639 | -3.371 |
| 8     | N         | 0.327  | 2.135  | -3.334 | Pt        | 0.000  | 0.000  | 0.000  |
| 9     | Pt        | 0.071  | 0.841  | -4.865 | N         | -0.262 | -0.804 | -1.839 |
| 10    | C         | -0.092 | -0.053 | -7.662 | C         | 0.069  | 0.071  | 2.937  |
| 11    | C         | -0.516 | -1.738 | -6.163 | C         | 0.632  | 2.082  | 1.987  |
| 12    | H         | 0.134  | 0.986  | -7.835 | H         | -0.208 | -0.962 | 2.803  |
| 13    | C         | -0.712 | -2.605 | -7.217 | C         | 0.813  | 2.609  | 3.248  |
| 14    | H         | -0.587 | -2.050 | -5.134 | H         | 0.762  | 2.665  | 1.089  |
| 15    | N         | -0.594 | -2.222 | -8.484 | N         | 0.619  | 1.895  | 4.352  |
| 16    | H         | -0.969 | -3.639 | -7.033 | H         | 1.120  | 3.639  | 3.371  |
| 17    | N         | -0.207 | -0.455 | -6.396 | N         | 0.262  | 0.804  | 1.839  |



|    |    |        |        |         |    |        |        |        |
|----|----|--------|--------|---------|----|--------|--------|--------|
| 18 | I  | -0.386 | 2.083  | 0.888   | I  | 0.083  | 0.526  | -5.895 |
| 19 | I  | -0.075 | -0.305 | -10.673 | I  | -0.083 | -0.526 | 5.895  |
| 20 | C  | 0.172  | 2.681  | -1.044  | C  | -0.248 | -0.645 | -4.189 |
| 21 | C  | -0.284 | -0.963 | -8.694  | C  | 0.248  | 0.645  | 4.189  |
| 22 | Cl | 1.439  | -0.707 | -3.805  | Cl | -1.212 | 1.866  | -0.643 |
| 23 | Cl | -1.242 | 2.410  | -5.936  | Cl | 1.212  | -1.866 | 0.643  |
| 24 | C  | -0.015 | -1.778 | 2.090   |    |        |        |        |
| 25 | C  | -0.794 | -3.372 | 3.542   |    |        |        |        |
| 26 | C  | -0.957 | -4.234 | 2.478   |    |        |        |        |
| 27 | N  | -0.646 | -3.896 | 1.231   |    |        |        |        |
| 28 | H  | 0.355  | -0.778 | 1.934   |    |        |        |        |
| 29 | H  | -1.017 | -3.653 | 4.558   |    |        |        |        |
| 30 | H  | -1.345 | -5.231 | 2.639   |    |        |        |        |
| 31 | Pt | -0.071 | -0.841 | 4.865   |    |        |        |        |
| 32 | N  | -0.327 | -2.135 | 3.334   |    |        |        |        |
| 33 | C  | 0.092  | 0.053  | 7.662   |    |        |        |        |
| 34 | C  | 0.516  | 1.738  | 6.163   |    |        |        |        |
| 35 | H  | -0.134 | -0.986 | 7.835   |    |        |        |        |
| 36 | C  | 0.712  | 2.605  | 7.217   |    |        |        |        |
| 37 | H  | 0.587  | 2.050  | 5.134   |    |        |        |        |
| 38 | N  | 0.594  | 2.222  | 8.484   |    |        |        |        |
| 39 | H  | 0.969  | 3.639  | 7.033   |    |        |        |        |
| 40 | N  | 0.207  | 0.455  | 6.396   |    |        |        |        |
| 41 | I  | 0.386  | -2.083 | -0.888  |    |        |        |        |
| 42 | I  | 0.075  | 0.305  | 10.673  |    |        |        |        |
| 43 | C  | -0.172 | -2.681 | 1.044   |    |        |        |        |
| 44 | C  | 0.284  | 0.963  | 8.694   |    |        |        |        |
| 45 | Cl | -1.439 | 0.707  | 3.805   |    |        |        |        |
| 46 | Cl | 1.242  | -2.410 | 5.936   |    |        |        |        |

Dimers: **1.11** [t-PtCl<sub>2</sub>(N<sub>2</sub>C<sub>4</sub>H<sub>3</sub>I)<sub>2</sub>]<sub>2</sub>Monomer: t-PtCl<sub>2</sub>(N<sub>2</sub>C<sub>4</sub>H<sub>3</sub>I)<sub>2</sub>

| Index | Atom type | x      | y      | z      | Atom type | x      | y      | z      |
|-------|-----------|--------|--------|--------|-----------|--------|--------|--------|
| 1     | C         | 0.813  | 3.345  | -3.391 | N         | -0.058 | -0.126 | -2.867 |
| 2     | C         | 0.974  | 4.257  | -2.358 | C         | -0.564 | -2.155 | -1.884 |
| 3     | C         | 0.619  | 3.866  | -1.094 | C         | -0.747 | -2.765 | -3.116 |
| 4     | N         | -0.003 | 1.732  | -1.949 | C         | -0.572 | -2.007 | -4.244 |
| 5     | H         | 1.041  | 3.575  | -4.420 | H         | -0.660 | -2.681 | -0.947 |
| 6     | H         | 1.362  | 5.243  | -2.565 | H         | -1.017 | -3.809 | -3.165 |
| 7     | H         | 0.710  | 4.525  | -0.244 | H         | -0.696 | -2.412 | -5.236 |
| 8     | N         | 0.347  | 2.126  | -3.158 | Pt        | 0.000  | 0.000  | 0.000  |
| 9     | Pt        | 0.086  | 0.813  | -4.655 | N         | -0.240 | -0.871 | -1.793 |
| 10    | N         | 0.022  | -0.094 | -7.380 | N         | 0.058  | 0.126  | 2.867  |
| 11    | C         | -0.604 | -1.741 | -5.885 | C         | 0.564  | 2.155  | 1.884  |
| 12    | C         | -0.825 | -2.655 | -6.904 | C         | 0.747  | 2.765  | 3.116  |
| 13    | H         | -0.734 | -1.982 | -4.842 | H         | 0.660  | 2.681  | 0.947  |
| 14    | C         | -0.607 | -2.248 | -8.194 | C         | 0.572  | 2.007  | 4.244  |
| 15    | H         | -1.158 | -3.655 | -6.669 | H         | 1.017  | 3.809  | 3.165  |
| 16    | H         | -0.758 | -2.903 | -9.039 | H         | 0.696  | 2.412  | 5.236  |
| 17    | N         | -0.202 | -0.503 | -6.146 | N         | 0.240  | 0.871  | 1.793  |

|    |    |        |        |         |    |        |        |        |
|----|----|--------|--------|---------|----|--------|--------|--------|
| 18 | I  | 0.219  | -0.187 | -10.283 | I  | 0.105  | 0.595  | -5.682 |
| 19 | C  | 0.118  | 2.571  | -0.941  | I  | -0.105 | -0.595 | 5.682  |
| 20 | I  | -0.508 | 1.852  | 0.925   | C  | -0.215 | -0.673 | -4.048 |
| 21 | C  | -0.171 | -0.935 | -8.369  | C  | 0.215  | 0.673  | 4.048  |
| 22 | Cl | 1.679  | -0.628 | -3.757  | Cl | -1.583 | 1.611  | -0.523 |
| 23 | Cl | -1.469 | 2.250  | -5.576  | Cl | 1.583  | -1.611 | 0.523  |
| 24 | N  | 0.202  | 0.503  | 6.146   |    |        |        |        |
| 25 | I  | 0.508  | -1.852 | -0.925  |    |        |        |        |
| 26 | N  | 0.003  | -1.732 | 1.949   |    |        |        |        |
| 27 | C  | -0.813 | -3.345 | 3.391   |    |        |        |        |
| 28 | C  | -0.974 | -4.257 | 2.358   |    |        |        |        |
| 29 | C  | -0.619 | -3.866 | 1.094   |    |        |        |        |
| 30 | H  | -1.041 | -3.575 | 4.420   |    |        |        |        |
| 31 | H  | -1.362 | -5.243 | 2.565   |    |        |        |        |
| 32 | H  | -0.710 | -4.525 | 0.244   |    |        |        |        |
| 33 | Pt | -0.086 | -0.813 | 4.655   |    |        |        |        |
| 34 | N  | -0.347 | -2.126 | 3.158   |    |        |        |        |
| 35 | N  | -0.022 | 0.094  | 7.380   |    |        |        |        |
| 36 | C  | 0.604  | 1.741  | 5.885   |    |        |        |        |
| 37 | C  | 0.825  | 2.655  | 6.904   |    |        |        |        |
| 38 | H  | 0.734  | 1.982  | 4.842   |    |        |        |        |
| 39 | C  | 0.607  | 2.248  | 8.194   |    |        |        |        |
| 40 | H  | 1.158  | 3.655  | 6.669   |    |        |        |        |
| 41 | H  | 0.758  | 2.903  | 9.039   |    |        |        |        |
| 42 | I  | -0.219 | 0.187  | 10.283  |    |        |        |        |
| 43 | C  | -0.118 | -2.571 | 0.941   |    |        |        |        |
| 44 | C  | 0.171  | 0.935  | 8.369   |    |        |        |        |
| 45 | Cl | -1.679 | 0.628  | 3.757   |    |        |        |        |
| 46 | Cl | 1.469  | -2.250 | 5.576   |    |        |        |        |

Dimers: **1.12** [t-PtCl<sub>2</sub>(N<sub>3</sub>C<sub>3</sub>H<sub>2</sub>I)<sub>2</sub>]<sub>2</sub>Monomer: t-PtCl<sub>2</sub>(N<sub>3</sub>C<sub>3</sub>H<sub>2</sub>I)<sub>2</sub>

| Index | Atom type | x      | y      | z       | Atom type | x      | y      | z      |
|-------|-----------|--------|--------|---------|-----------|--------|--------|--------|
| 1     | N         | 1.334  | 2.774  | -2.925  | C         | 0.000  | 2.846  | -0.071 |
| 2     | N         | 1.536  | 3.538  | -1.899  | N         | -1.871 | 2.109  | 1.090  |
| 3     | C         | 0.880  | 3.337  | -0.754  | N         | -2.362 | 3.308  | 1.091  |
| 4     | C         | -0.282 | 1.592  | -1.754  | C         | -1.700 | 4.322  | 0.535  |
| 5     | H         | 1.141  | 4.008  | 0.053   | H         | 0.929  | 2.545  | -0.531 |
| 6     | H         | -1.012 | 0.799  | -1.812  | H         | -2.186 | 5.286  | 0.595  |
| 7     | N         | 0.435  | 1.812  | -2.852  | Pt        | 0.000  | 0.000  | 0.544  |
| 8     | Pt        | 0.213  | 0.610  | -4.448  | N         | -0.702 | 1.880  | 0.523  |
| 9     | C         | -0.199 | -0.077 | -7.253  | C         | 0.000  | -2.846 | -0.071 |
| 10    | N         | -0.092 | -1.896 | -5.813  | N         | 1.871  | -2.109 | 1.090  |
| 11    | H         | -0.177 | 1.000  | -7.319  | H         | -0.929 | -2.545 | -0.531 |
| 12    | N         | -0.277 | -2.711 | -6.801  | N         | 2.362  | -3.308 | 1.091  |
| 13    | C         | -0.413 | -2.259 | -8.048  | C         | 1.700  | -4.322 | 0.535  |
| 14    | H         | -0.555 | -3.016 | -8.807  | H         | 2.186  | -5.286 | 0.595  |
| 15    | N         | -0.048 | -0.596 | -6.034  | N         | 0.702  | -1.880 | 0.523  |
| 16    | I         | -0.604 | -0.164 | -10.259 | I         | 0.577  | 5.686  | -0.972 |
| 17    | C         | -0.062 | 2.339  | -0.614  | I         | -0.577 | -5.686 | -0.972 |

|    |    |        |        |        |    |        |        |        |
|----|----|--------|--------|--------|----|--------|--------|--------|
| 18 | I  | -1.019 | 1.873  | 1.178  | C  | -0.480 | 4.138  | -0.079 |
| 19 | C  | -0.382 | -0.912 | -8.335 | C  | 0.480  | -4.138 | -0.079 |
| 20 | Cl | 2.193  | -0.476 | -3.904 | Cl | 0.000  | 0.000  | 2.844  |
| 21 | Cl | -1.758 | 1.694  | -4.985 | Cl | 0.000  | 0.000  | -1.785 |
| 22 | N  | 0.048  | 0.596  | 6.034  |    |        |        |        |
| 23 | I  | 1.019  | -1.873 | -1.178 |    |        |        |        |
| 24 | I  | 0.604  | 0.164  | 10.259 |    |        |        |        |
| 25 | C  | 0.282  | -1.592 | 1.754  |    |        |        |        |
| 26 | N  | -1.334 | -2.774 | 2.925  |    |        |        |        |
| 27 | N  | -1.536 | -3.538 | 1.899  |    |        |        |        |
| 28 | C  | -0.880 | -3.337 | 0.754  |    |        |        |        |
| 29 | H  | 1.012  | -0.799 | 1.812  |    |        |        |        |
| 30 | H  | -1.141 | -4.008 | -0.053 |    |        |        |        |
| 31 | Pt | -0.213 | -0.610 | 4.448  |    |        |        |        |
| 32 | N  | -0.435 | -1.812 | 2.852  |    |        |        |        |
| 33 | C  | 0.199  | 0.077  | 7.253  |    |        |        |        |
| 34 | N  | 0.092  | 1.896  | 5.813  |    |        |        |        |
| 35 | H  | 0.177  | -1.000 | 7.319  |    |        |        |        |
| 36 | N  | 0.277  | 2.711  | 6.801  |    |        |        |        |
| 37 | C  | 0.413  | 2.259  | 8.048  |    |        |        |        |
| 38 | H  | 0.555  | 3.016  | 8.807  |    |        |        |        |
| 39 | C  | 0.062  | -2.339 | 0.614  |    |        |        |        |
| 40 | C  | 0.382  | 0.912  | 8.335  |    |        |        |        |
| 41 | Cl | -2.193 | 0.476  | 3.904  |    |        |        |        |
| 42 | Cl | 1.758  | -1.694 | 4.985  |    |        |        |        |

Dimers: **1.13** [t-PtCl<sub>2</sub>(N<sub>2</sub>C<sub>3</sub>H<sub>3</sub>Cl)<sub>2</sub>]<sub>2</sub>Monomer: t-PtCl<sub>2</sub>(N<sub>2</sub>C<sub>3</sub>H<sub>3</sub>Cl)<sub>2</sub>

| Index | Atom type | <i>x</i> | <i>y</i> | <i>z</i> | Atom type | <i>x</i> | <i>y</i> | <i>z</i> |
|-------|-----------|----------|----------|----------|-----------|----------|----------|----------|
| 1     | C         | 0.688    | 2.821    | -3.014   | C         | 2.573    | -1.571   | 0.517    |
| 2     | C         | 0.612    | 3.184    | -1.710   | C         | 3.920    | -1.434   | 0.461    |
| 3     | C         | -0.341   | 1.208    | -1.990   | C         | 2.944    | 0.451    | -0.187   |
| 4     | H         | 1.102    | 3.350    | -3.852   | H         | 1.980    | -2.422   | 0.796    |
| 5     | H         | 0.950    | 4.052    | -1.176   | H         | 4.730    | -2.100   | 0.687    |
| 6     | H         | -0.839   | 0.284    | -1.763   | H         | 2.817    | 1.467    | -0.512   |
| 7     | N         | 0.099    | 1.589    | -3.171   | N         | 1.983    | -0.395   | 0.115    |
| 8     | Pt        | -0.023   | 0.504    | -4.868   | Pt        | 0.000    | 0.000    | 0.000    |
| 9     | Cl        | 0.385    | -1.454   | -3.664   | Cl        | 0.433    | 2.244    | 0.425    |
| 10    | Cl        | -0.404   | 2.447    | -6.069   | Cl        | -0.433   | -2.244   | -0.425   |
| 11    | Cl        | -0.335   | 2.018    | 0.572    | Cl        | 5.626    | 0.564    | -0.251   |
| 12    | C         | 0.185    | -0.133   | -7.777   | C         | -2.944   | -0.451   | 0.187    |
| 13    | C         | -0.575   | -1.872   | -6.720   | C         | -2.573   | 1.571    | -0.517   |
| 14    | H         | 0.538    | 0.853    | -8.017   | H         | -2.817   | -1.467   | 0.512    |
| 15    | C         | -0.512   | -2.224   | -8.027   | C         | -3.920   | 1.434    | -0.461   |
| 16    | H         | -0.880   | -2.450   | -5.868   | H         | -1.980   | 2.422    | -0.796   |
| 17    | H         | -0.756   | -3.129   | -8.550   | H         | -4.730   | 2.100    | -0.687   |
| 18    | N         | -0.141   | -0.574   | -6.582   | N         | -1.983   | 0.395    | -0.115   |
| 19    | Cl        | 0.258    | -0.983   | -10.323  | Cl        | -5.626   | -0.564   | 0.251    |
| 20    | N         | -0.047   | 2.154    | -1.086   | N         | 4.129    | -0.151   | 0.012    |
| 21    | N         | -0.028   | -1.112   | -8.673   | N         | -4.129   | 0.151    | -0.012   |

|    |    |        |        |        |
|----|----|--------|--------|--------|
| 22 | C  | 0.341  | -1.208 | 1.990  |
| 23 | C  | -0.688 | -2.821 | 3.014  |
| 24 | C  | -0.612 | -3.184 | 1.710  |
| 25 | H  | 0.839  | -0.284 | 1.763  |
| 26 | H  | -1.102 | -3.350 | 3.852  |
| 27 | H  | -0.950 | -4.052 | 1.176  |
| 28 | Pt | 0.023  | -0.504 | 4.868  |
| 29 | Cl | -0.385 | 1.454  | 3.664  |
| 30 | Cl | 0.404  | -2.447 | 6.069  |
| 31 | Cl | 0.335  | -2.018 | -0.572 |
| 32 | N  | -0.099 | -1.589 | 3.171  |
| 33 | C  | -0.185 | 0.133  | 7.777  |
| 34 | C  | 0.575  | 1.872  | 6.720  |
| 35 | H  | -0.538 | -0.853 | 8.017  |
| 36 | C  | 0.512  | 2.224  | 8.027  |
| 37 | H  | 0.880  | 2.450  | 5.868  |
| 38 | H  | 0.756  | 3.129  | 8.550  |
| 39 | N  | 0.141  | 0.574  | 6.582  |
| 40 | Cl | -0.258 | 0.983  | 10.323 |
| 41 | N  | 0.047  | -2.154 | 1.086  |
| 42 | N  | 0.028  | 1.112  | 8.673  |

Dimers: **1.14** [t-PtCl<sub>2</sub>(N<sub>2</sub>C<sub>3</sub>H<sub>3</sub>Br)<sub>2</sub>]<sub>2</sub>Monomer: t-PtCl<sub>2</sub>(N<sub>2</sub>C<sub>3</sub>H<sub>3</sub>Br)<sub>2</sub>

| Index | Atom type | x      | y      | z       | Atom type | x      | y      | z      |
|-------|-----------|--------|--------|---------|-----------|--------|--------|--------|
| 1     | C         | 0.672  | 2.433  | -3.153  | C         | 0.121  | -0.900 | -2.843 |
| 2     | C         | 0.566  | 2.933  | -1.895  | C         | -0.516 | -2.559 | -1.596 |
| 3     | C         | -0.517 | 1.024  | -2.017  | C         | -0.487 | -3.029 | -2.866 |
| 4     | H         | 1.159  | 2.842  | -4.018  | H         | 0.419  | 0.075  | -3.184 |
| 5     | H         | 0.950  | 3.828  | -1.444  | H         | -0.759 | -3.065 | -0.680 |
| 6     | H         | -1.100 | 0.171  | -1.725  | H         | -0.709 | -3.991 | -3.286 |
| 7     | N         | 0.001  | 1.236  | -3.208  | Pt        | 0.000  | 0.000  | 0.000  |
| 8     | Pt        | -0.110 | -0.019 | -4.778  | Cl        | -0.511 | 1.810  | -1.367 |
| 9     | Cl        | 0.810  | -1.766 | -3.509  | Cl        | 0.511  | -1.810 | 1.367  |
| 10    | Cl        | -0.945 | 1.714  | -6.051  | Br        | 0.154  | -1.982 | -5.450 |
| 11    | Br        | -0.502 | 2.013  | 0.643   | N         | -0.138 | -1.236 | -1.598 |
| 12    | C         | -0.121 | -0.889 | -7.636  | C         | -0.121 | 0.900  | 2.843  |
| 13    | C         | -0.440 | -2.622 | -6.369  | C         | 0.516  | 2.559  | 1.596  |
| 14    | H         | 0.024  | 0.118  | -7.983  | H         | -0.419 | -0.075 | 3.184  |
| 15    | C         | -0.465 | -3.076 | -7.646  | C         | 0.487  | 3.029  | 2.866  |
| 16    | H         | -0.544 | -3.164 | -5.448  | H         | 0.759  | 3.065  | 0.680  |
| 17    | H         | -0.604 | -4.055 | -8.063  | H         | 0.709  | 3.991  | 3.286  |
| 18    | N         | -0.228 | -1.264 | -6.379  | N         | 0.138  | 1.236  | 1.598  |
| 19    | Br        | -0.183 | -1.938 | -10.256 | Br        | -0.154 | 1.982  | 5.450  |
| 20    | N         | -0.197 | 2.032  | -1.195  | N         | -0.080 | -1.966 | -3.638 |
| 21    | N         | -0.259 | -1.965 | -8.430  | N         | 0.080  | 1.966  | 3.638  |
| 22    | C         | 0.517  | -1.024 | 2.017   |           |        |        |        |
| 23    | C         | -0.672 | -2.433 | 3.153   |           |        |        |        |
| 24    | C         | -0.566 | -2.933 | 1.895   |           |        |        |        |
| 25    | H         | 1.100  | -0.171 | 1.725   |           |        |        |        |

|    |    |        |        |        |
|----|----|--------|--------|--------|
| 26 | H  | -1.159 | -2.842 | 4.018  |
| 27 | H  | -0.950 | -3.828 | 1.444  |
| 28 | Pt | 0.110  | 0.019  | 4.778  |
| 29 | Cl | -0.810 | 1.766  | 3.509  |
| 30 | Cl | 0.945  | -1.714 | 6.051  |
| 31 | Br | 0.502  | -2.013 | -0.643 |
| 32 | N  | -0.001 | -1.236 | 3.208  |
| 33 | C  | 0.121  | 0.889  | 7.636  |
| 34 | C  | 0.440  | 2.622  | 6.369  |
| 35 | H  | -0.024 | -0.118 | 7.983  |
| 36 | C  | 0.465  | 3.076  | 7.646  |
| 37 | H  | 0.544  | 3.164  | 5.448  |
| 38 | H  | 0.604  | 4.055  | 8.063  |
| 39 | N  | 0.228  | 1.264  | 6.379  |
| 40 | Br | 0.183  | 1.938  | 10.256 |
| 41 | N  | 0.197  | -2.032 | 1.195  |
| 42 | N  | 0.259  | 1.965  | 8.430  |

Dimers: **1.15** [t-PtCl<sub>2</sub>(N<sub>2</sub>C<sub>3</sub>H<sub>3</sub>I)<sub>2</sub>]<sub>2</sub>Monomer: t-PtCl<sub>2</sub>(N<sub>2</sub>C<sub>3</sub>H<sub>3</sub>I)<sub>2</sub>

| Index | Atom type | <i>x</i> | <i>y</i> | <i>z</i> | Atom type | <i>x</i> | <i>y</i> | <i>z</i> |
|-------|-----------|----------|----------|----------|-----------|----------|----------|----------|
| 1     | C         | 1.241    | 1.804    | -2.531   | C         | -1.444   | 0.853    | 2.559    |
| 2     | C         | 0.991    | 2.298    | -1.291   | C         | -1.311   | 0.798    | 3.905    |
| 3     | C         | -0.753   | 1.175    | -1.974   | C         | 0.409    | -0.203   | 2.951    |
| 4     | H         | 2.119    | 1.891    | -3.144   | H         | -2.230   | 1.273    | 1.960    |
| 5     | H         | 1.598    | 2.888    | -0.630   | H         | -1.929   | 1.166    | 4.702    |
| 6     | H         | -1.722   | 0.710    | -1.991   | H         | 1.345    | -0.715   | 2.820    |
| 7     | N         | 0.141    | 1.097    | -2.943   | N         | -0.366   | 0.228    | 1.978    |
| 8     | Pt        | -0.005   | -0.087   | -4.562   | Pt        | 0.000    | 0.000    | 0.000    |
| 9     | Cl        | 1.795    | -1.375   | -3.749   | Cl        | 2.286    | 0.035    | 0.426    |
| 10    | Cl        | -1.785   | 1.167    | -5.301   | Cl        | -2.286   | -0.035   | -0.426   |
| 11    | I         | -1.030   | 1.833    | 1.001    | I         | 0.666    | -0.308   | 5.943    |
| 12    | C         | -0.598   | -0.915   | -7.372   | C         | -0.409   | 0.203    | -2.951   |
| 13    | C         | 0.147    | -2.632   | -6.278   | C         | 1.444    | -0.853   | -2.559   |
| 14    | H         | -0.941   | 0.073    | -7.619   | H         | -1.345   | 0.715    | -2.820   |
| 15    | C         | -0.113   | -3.061   | -7.536   | C         | 1.311    | -0.798   | -3.905   |
| 16    | H         | 0.538    | -3.172   | -5.436   | H         | 2.230    | -1.273   | -1.960   |
| 17    | H         | -0.011   | -4.024   | -8.000   | H         | 1.929    | -1.166   | -4.702   |
| 18    | N         | -0.160   | -1.295   | -6.190   | N         | 0.366    | -0.228   | -1.978   |
| 19    | I         | -1.160   | -1.906   | -10.154  | I         | -0.666   | 0.308    | -5.943   |
| 20    | N         | -0.278   | 1.899    | -0.953   | N         | -0.132   | 0.123    | 4.139    |
| 21    | N         | -0.583   | -1.960   | -8.219   | N         | 0.132    | -0.123   | -4.139   |
| 22    | N         | 0.160    | 1.295    | 6.190    |           |          |          |          |
| 23    | C         | 0.753    | -1.175   | 1.974    |           |          |          |          |
| 24    | C         | -1.241   | -1.804   | 2.531    |           |          |          |          |
| 25    | C         | -0.991   | -2.298   | 1.291    |           |          |          |          |
| 26    | H         | 1.722    | -0.710   | 1.991    |           |          |          |          |
| 27    | H         | -2.119   | -1.891   | 3.144    |           |          |          |          |
| 28    | H         | -1.598   | -2.888   | 0.630    |           |          |          |          |
| 29    | Pt        | 0.005    | 0.087    | 4.562    |           |          |          |          |

|    |    |        |        |        |
|----|----|--------|--------|--------|
| 30 | Cl | -1.795 | 1.375  | 3.749  |
| 31 | Cl | 1.785  | -1.167 | 5.301  |
| 32 | I  | 1.030  | -1.833 | -1.001 |
| 33 | N  | -0.141 | -1.097 | 2.943  |
| 34 | C  | 0.598  | 0.915  | 7.372  |
| 35 | C  | -0.147 | 2.632  | 6.278  |
| 36 | H  | 0.941  | -0.073 | 7.619  |
| 37 | C  | 0.113  | 3.061  | 7.536  |
| 38 | H  | -0.538 | 3.172  | 5.436  |
| 39 | H  | 0.011  | 4.024  | 8.000  |
| 40 | I  | 1.160  | 1.906  | 10.154 |
| 41 | N  | 0.278  | -1.899 | 0.953  |
| 42 | N  | 0.583  | 1.960  | 8.219  |

Dimers: 2.1 [t-PdCl<sub>2</sub>(NC<sub>5</sub>H<sub>4</sub>Cl)<sub>2</sub>]<sub>2</sub>

| Index | Atom type | x      | y      | z      |
|-------|-----------|--------|--------|--------|
| 1     | C         | 1.246  | -1.154 | 2.652  |
| 2     | C         | 1.106  | -1.474 | 3.988  |
| 3     | C         | 1.319  | -0.502 | 4.948  |
| 4     | C         | 1.652  | 0.770  | 4.524  |
| 5     | C         | 1.759  | 1.040  | 3.173  |
| 6     | H         | 1.100  | -1.880 | 1.865  |
| 7     | H         | 0.840  | -2.482 | 4.266  |
| 8     | H         | 1.228  | -0.720 | 6.002  |
| 9     | H         | 1.990  | 2.029  | 2.808  |
| 10    | N         | 1.567  | 0.084  | 2.264  |
| 11    | Pd        | 1.811  | 0.451  | 0.281  |
| 12    | Cl        | 0.445  | 2.329  | 0.426  |
| 13    | Cl        | 3.353  | -1.263 | 0.189  |
| 14    | C         | 1.873  | -0.354 | -2.522 |
| 15    | C         | 2.338  | 1.895  | -2.247 |
| 16    | C         | 2.055  | -0.244 | -3.888 |
| 17    | H         | 1.609  | -1.290 | -2.051 |
| 18    | C         | 2.542  | 2.059  | -3.602 |
| 19    | H         | 2.416  | 2.716  | -1.551 |
| 20    | C         | 2.402  | 0.972  | -4.445 |
| 21    | H         | 2.811  | 3.031  | -3.988 |
| 22    | H         | 2.556  | 1.061  | -5.511 |
| 23    | N         | 2.020  | 0.708  | -1.725 |
| 24    | Cl        | 1.941  | 2.039  | 5.665  |
| 25    | Cl        | 1.849  | -1.644 | -4.882 |
| 26    | C         | -1.652 | -0.770 | -4.524 |
| 27    | C         | -1.759 | -1.040 | -3.173 |
| 28    | C         | -1.246 | 1.154  | -2.652 |
| 29    | C         | -1.106 | 1.474  | -3.988 |
| 30    | C         | -1.319 | 0.502  | -4.948 |
| 31    | H         | -1.990 | -2.029 | -2.808 |
| 32    | H         | -1.100 | 1.880  | -1.865 |
| 33    | H         | -0.840 | 2.482  | -4.266 |

|    |    |        |        |        |
|----|----|--------|--------|--------|
| 34 | H  | -1.228 | 0.720  | -6.002 |
| 35 | Pd | -1.811 | -0.451 | -0.281 |
| 36 | Cl | -0.445 | -2.329 | -0.426 |
| 37 | Cl | -3.353 | 1.263  | -0.189 |
| 38 | N  | -1.567 | -0.084 | -2.264 |
| 39 | C  | -1.873 | 0.354  | 2.522  |
| 40 | C  | -2.338 | -1.895 | 2.247  |
| 41 | C  | -2.055 | 0.244  | 3.888  |
| 42 | H  | -1.609 | 1.290  | 2.051  |
| 43 | C  | -2.542 | -2.059 | 3.602  |
| 44 | H  | -2.416 | -2.716 | 1.551  |
| 45 | C  | -2.402 | -0.972 | 4.445  |
| 46 | H  | -2.811 | -3.031 | 3.988  |
| 47 | H  | -2.556 | -1.061 | 5.511  |
| 48 | N  | -2.020 | -0.708 | 1.725  |
| 49 | Cl | -1.849 | 1.644  | 4.882  |
| 50 | Cl | -1.941 | -2.039 | -5.665 |

Dimers: **2.2** [t-PtCl<sub>2</sub>(NC<sub>5</sub>H<sub>4</sub>Cl)<sub>2</sub>]<sub>2</sub>

| Index | Atom type | x      | y      | z      |
|-------|-----------|--------|--------|--------|
| 1     | C         | -1.673 | -0.793 | -4.522 |
| 2     | C         | -1.788 | -1.072 | -3.175 |
| 3     | C         | -1.226 | 1.108  | -2.637 |
| 4     | C         | -1.085 | 1.434  | -3.970 |
| 5     | C         | -1.317 | 0.476  | -4.938 |
| 6     | H         | -2.044 | -2.057 | -2.817 |
| 7     | H         | -1.058 | 1.824  | -1.846 |
| 8     | H         | -0.798 | 2.439  | -4.239 |
| 9     | H         | -1.223 | 0.699  | -5.990 |
| 10    | Pt        | -1.823 | -0.498 | -0.282 |
| 11    | Cl        | -0.519 | -2.422 | -0.442 |
| 12    | Cl        | -3.266 | 1.308  | -0.164 |
| 13    | N         | -1.576 | -0.127 | -2.254 |
| 14    | C         | -1.859 | 0.311  | 2.514  |
| 15    | C         | -2.368 | -1.931 | 2.246  |
| 16    | C         | -2.046 | 0.210  | 3.878  |
| 17    | H         | -1.572 | 1.240  | 2.042  |
| 18    | C         | -2.568 | -2.085 | 3.602  |
| 19    | H         | -2.467 | -2.751 | 1.553  |
| 20    | C         | -2.413 | -0.998 | 4.442  |
| 21    | H         | -2.852 | -3.051 | 3.991  |
| 22    | H         | -2.569 | -1.080 | 5.508  |
| 23    | Cl        | -1.820 | 1.612  | 4.865  |
| 24    | N         | -2.029 | -0.750 | 1.716  |
| 25    | Cl        | -1.980 | -2.050 | -5.671 |
| 26    | C         | 1.226  | -1.108 | 2.637  |
| 27    | C         | 1.085  | -1.434 | 3.970  |
| 28    | C         | 1.317  | -0.476 | 4.938  |
| 29    | C         | 1.673  | 0.793  | 4.522  |

|    |    |       |        |        |
|----|----|-------|--------|--------|
| 30 | C  | 1.788 | 1.072  | 3.175  |
| 31 | H  | 1.058 | -1.824 | 1.846  |
| 32 | H  | 0.798 | -2.439 | 4.239  |
| 33 | H  | 1.223 | -0.699 | 5.990  |
| 34 | H  | 2.044 | 2.057  | 2.817  |
| 35 | N  | 1.576 | 0.127  | 2.254  |
| 36 | Pt | 1.823 | 0.498  | 0.282  |
| 37 | Cl | 0.519 | 2.422  | 0.442  |
| 38 | Cl | 3.266 | -1.308 | 0.164  |
| 39 | C  | 1.859 | -0.311 | -2.514 |
| 40 | C  | 2.368 | 1.931  | -2.246 |
| 41 | C  | 2.046 | -0.210 | -3.878 |
| 42 | H  | 1.572 | -1.240 | -2.042 |
| 43 | C  | 2.568 | 2.085  | -3.602 |
| 44 | H  | 2.467 | 2.751  | -1.553 |
| 45 | C  | 2.413 | 0.998  | -4.442 |
| 46 | H  | 2.852 | 3.051  | -3.991 |
| 47 | H  | 2.569 | 1.080  | -5.508 |
| 48 | N  | 2.029 | 0.750  | -1.716 |
| 49 | Cl | 1.980 | 2.050  | 5.671  |
| 50 | Cl | 1.820 | -1.612 | -4.865 |

Dimers:  $2.3 [t-PtCl_2(NC_5H_4F)_2]_2$ Monomer:  $t-PtCl_2(NC_5H_4F)_2$ 

| Index | Atom type | x      | y      | z      | Atom type | x      | y      | z      |
|-------|-----------|--------|--------|--------|-----------|--------|--------|--------|
| 1     | C         | -1.586 | -0.813 | -4.494 | C         | 4.206  | 0.479  | 0.272  |
| 2     | C         | -1.729 | -1.093 | -3.153 | C         | 2.842  | 0.661  | 0.335  |
| 3     | C         | -1.260 | 1.113  | -2.628 | C         | 2.508  | -1.411 | -0.631 |
| 4     | C         | -1.104 | 1.433  | -3.961 | C         | 3.868  | -1.628 | -0.725 |
| 5     | C         | -1.275 | 0.458  | -4.927 | C         | 4.750  | -0.668 | -0.263 |
| 6     | H         | -1.955 | -2.088 | -2.804 | H         | 2.413  | 1.570  | 0.727  |
| 7     | H         | -1.134 | 1.842  | -1.843 | H         | 1.790  | -2.145 | -0.957 |
| 8     | H         | -0.851 | 2.446  | -4.232 | H         | 4.227  | -2.550 | -1.155 |
| 9     | H         | -1.167 | 0.663  | -5.982 | H         | 5.821  | -0.796 | -0.311 |
| 10    | Pt        | -1.828 | -0.494 | -0.263 | Pt        | 0.000  | 0.000  | 0.000  |
| 11    | Cl        | -0.534 | -2.426 | -0.412 | Cl        | 0.256  | 2.131  | -0.877 |
| 12    | Cl        | -3.266 | 1.316  | -0.141 | Cl        | -0.255 | -2.131 | 0.877  |
| 13    | N         | -1.574 | -0.131 | -2.239 | N         | 2.007  | -0.283 | -0.112 |
| 14    | C         | -1.814 | 0.326  | 2.525  | C         | -2.842 | -0.661 | -0.335 |
| 15    | C         | -2.394 | -1.902 | 2.276  | C         | -2.508 | 1.411  | 0.631  |
| 16    | C         | -1.980 | 0.221  | 3.888  | C         | -4.206 | -0.479 | -0.272 |
| 17    | H         | -1.510 | 1.251  | 2.056  | H         | -2.413 | -1.570 | -0.727 |
| 18    | C         | -2.581 | -2.045 | 3.636  | C         | -3.868 | 1.628  | 0.725  |
| 19    | H         | -2.528 | -2.721 | 1.589  | H         | -1.790 | 2.145  | 0.957  |
| 20    | C         | -2.376 | -0.962 | 4.472  | C         | -4.750 | 0.668  | 0.263  |
| 21    | H         | -2.889 | -3.001 | 4.031  | H         | -4.227 | 2.550  | 1.155  |
| 22    | H         | -2.512 | -1.025 | 5.542  | H         | -5.821 | 0.796  | 0.311  |
| 23    | N         | -2.028 | -0.734 | 1.736  | N         | -2.007 | 0.283  | 0.112  |
| 24    | F         | -1.748 | 1.292  | 4.644  | F         | -4.999 | -1.442 | -0.739 |
| 25    | F         | -1.755 | -1.797 | -5.373 | F         | 4.999  | 1.442  | 0.739  |



|    |    |       |        |        |
|----|----|-------|--------|--------|
| 26 | C  | 1.260 | -1.113 | 2.628  |
| 27 | C  | 1.104 | -1.433 | 3.961  |
| 28 | C  | 1.275 | -0.458 | 4.927  |
| 29 | C  | 1.586 | 0.813  | 4.494  |
| 30 | C  | 1.729 | 1.093  | 3.153  |
| 31 | H  | 1.134 | -1.842 | 1.843  |
| 32 | H  | 0.851 | -2.446 | 4.232  |
| 33 | H  | 1.167 | -0.663 | 5.982  |
| 34 | H  | 1.955 | 2.088  | 2.804  |
| 35 | N  | 1.574 | 0.131  | 2.239  |
| 36 | Pt | 1.828 | 0.494  | 0.263  |
| 37 | Cl | 0.534 | 2.426  | 0.412  |
| 38 | Cl | 3.266 | -1.316 | 0.141  |
| 39 | C  | 1.814 | -0.326 | -2.525 |
| 40 | C  | 2.394 | 1.902  | -2.276 |
| 41 | C  | 1.980 | -0.221 | -3.888 |
| 42 | H  | 1.510 | -1.251 | -2.056 |
| 43 | C  | 2.581 | 2.045  | -3.636 |
| 44 | H  | 2.528 | 2.721  | -1.589 |
| 45 | C  | 2.376 | 0.962  | -4.472 |
| 46 | H  | 2.889 | 3.001  | -4.031 |
| 47 | H  | 2.512 | 1.025  | -5.542 |
| 48 | N  | 2.028 | 0.734  | -1.736 |
| 49 | F  | 1.755 | 1.797  | 5.373  |
| 50 | F  | 1.748 | -1.292 | -4.644 |

Dimers: **2.4** [t-PtCl<sub>2</sub>(NC<sub>5</sub>H<sub>4</sub>Br)<sub>2</sub>]<sub>2</sub>

| Index | Atom type | x      | y      | z      |
|-------|-----------|--------|--------|--------|
| 1     | C         | -1.717 | -0.784 | -4.544 |
| 2     | C         | -1.818 | -1.067 | -3.196 |
| 3     | C         | -1.210 | 1.101  | -2.655 |
| 4     | C         | -1.078 | 1.430  | -3.987 |
| 5     | C         | -1.341 | 0.480  | -4.957 |
| 6     | H         | -2.086 | -2.047 | -2.835 |
| 7     | H         | -1.024 | 1.810  | -1.862 |
| 8     | H         | -0.776 | 2.431  | -4.256 |
| 9     | H         | -1.254 | 0.712  | -6.009 |
| 10    | Pt        | -1.819 | -0.504 | -0.302 |
| 11    | Cl        | -0.509 | -2.424 | -0.466 |
| 12    | Cl        | -3.265 | 1.300  | -0.186 |
| 13    | N         | -1.577 | -0.130 | -2.274 |
| 14    | C         | -1.872 | 0.304  | 2.495  |
| 15    | C         | -2.353 | -1.944 | 2.224  |
| 16    | C         | -2.066 | 0.202  | 3.858  |
| 17    | H         | -1.593 | 1.233  | 2.020  |
| 18    | C         | -2.557 | -2.101 | 3.579  |
| 19    | H         | -2.440 | -2.766 | 1.531  |
| 20    | C         | -2.419 | -1.011 | 4.419  |
| 21    | H         | -2.830 | -3.071 | 3.967  |

|    |    |        |        |        |
|----|----|--------|--------|--------|
| 22 | H  | -2.582 | -1.099 | 5.484  |
| 23 | N  | -2.027 | -0.760 | 1.696  |
| 24 | Br | -1.851 | 1.736  | 4.929  |
| 25 | Br | -2.102 | -2.138 | -5.795 |
| 26 | C  | 1.872  | -0.304 | -2.495 |
| 27 | C  | 2.353  | 1.944  | -2.224 |
| 28 | C  | 2.066  | -0.202 | -3.858 |
| 29 | H  | 1.593  | -1.233 | -2.020 |
| 30 | C  | 2.557  | 2.101  | -3.579 |
| 31 | H  | 2.440  | 2.766  | -1.531 |
| 32 | C  | 2.419  | 1.011  | -4.419 |
| 33 | H  | 2.830  | 3.071  | -3.967 |
| 34 | H  | 2.582  | 1.099  | -5.484 |
| 35 | N  | 2.027  | 0.760  | -1.696 |
| 36 | C  | 1.210  | -1.101 | 2.655  |
| 37 | C  | 1.078  | -1.430 | 3.987  |
| 38 | C  | 1.341  | -0.480 | 4.957  |
| 39 | C  | 1.717  | 0.784  | 4.544  |
| 40 | C  | 1.818  | 1.067  | 3.196  |
| 41 | H  | 1.024  | -1.810 | 1.862  |
| 42 | H  | 0.776  | -2.431 | 4.256  |
| 43 | H  | 1.254  | -0.712 | 6.009  |
| 44 | H  | 2.086  | 2.047  | 2.835  |
| 45 | N  | 1.577  | 0.130  | 2.274  |
| 46 | Pt | 1.819  | 0.504  | 0.302  |
| 47 | Cl | 0.509  | 2.424  | 0.466  |
| 48 | Cl | 3.265  | -1.300 | 0.186  |
| 49 | Br | 2.102  | 2.138  | 5.795  |
| 50 | Br | 1.851  | -1.736 | -4.929 |

Dimers:  $2.5 [t\text{-PtCl}_2(\text{NC}_5\text{H}_4\text{I})_2]_2$

| Index | Atom type | <i>x</i> | <i>y</i> | <i>z</i> |
|-------|-----------|----------|----------|----------|
| 1     | C         | -1.801   | -0.775   | -4.582   |
| 2     | C         | -1.873   | -1.062   | -3.232   |
| 3     | C         | -1.191   | 1.083    | -2.688   |
| 4     | C         | -1.077   | 1.418    | -4.021   |
| 5     | C         | -1.393   | 0.483    | -4.990   |
| 6     | H         | -2.161   | -2.034   | -2.864   |
| 7     | H         | -0.970   | 1.782    | -1.894   |
| 8     | H         | -0.752   | 2.412    | -4.290   |
| 9     | H         | -1.323   | 0.729    | -6.040   |
| 10    | Pt        | -1.814   | -0.516   | -0.337   |
| 11    | Cl        | -0.490   | -2.425   | -0.506   |
| 12    | Cl        | -3.269   | 1.281    | -0.225   |
| 13    | N         | -1.584   | -0.140   | -2.309   |
| 14    | C         | -1.895   | 0.290    | 2.460    |
| 15    | C         | -2.329   | -1.967   | 2.187    |
| 16    | C         | -2.100   | 0.193    | 3.824    |
| 17    | H         | -1.626   | 1.220    | 1.980    |

|    |    |        |        |        |
|----|----|--------|--------|--------|
| 18 | C  | -2.541 | -2.126 | 3.541  |
| 19 | H  | -2.396 | -2.790 | 1.494  |
| 20 | C  | -2.433 | -1.030 | 4.379  |
| 21 | H  | -2.797 | -3.100 | 3.928  |
| 22 | H  | -2.606 | -1.128 | 5.441  |
| 23 | N  | -2.022 | -0.777 | 1.660  |
| 24 | I  | -1.922 | 1.905  | 5.003  |
| 25 | I  | -2.321 | -2.248 | -5.968 |
| 26 | C  | 1.191  | -1.083 | 2.688  |
| 27 | C  | 1.077  | -1.418 | 4.021  |
| 28 | C  | 1.393  | -0.483 | 4.990  |
| 29 | C  | 1.801  | 0.775  | 4.582  |
| 30 | C  | 1.873  | 1.062  | 3.232  |
| 31 | H  | 0.970  | -1.782 | 1.894  |
| 32 | H  | 0.752  | -2.412 | 4.290  |
| 33 | H  | 1.323  | -0.729 | 6.040  |
| 34 | H  | 2.161  | 2.034  | 2.864  |
| 35 | N  | 1.584  | 0.140  | 2.309  |
| 36 | Pt | 1.814  | 0.516  | 0.337  |
| 37 | Cl | 0.490  | 2.425  | 0.506  |
| 38 | Cl | 3.269  | -1.281 | 0.225  |
| 39 | C  | 1.895  | -0.290 | -2.460 |
| 40 | C  | 2.329  | 1.967  | -2.187 |
| 41 | C  | 2.100  | -0.193 | -3.824 |
| 42 | H  | 1.626  | -1.220 | -1.980 |
| 43 | C  | 2.541  | 2.126  | -3.541 |
| 44 | H  | 2.396  | 2.790  | -1.494 |
| 45 | C  | 2.433  | 1.030  | -4.379 |
| 46 | H  | 2.797  | 3.100  | -3.928 |
| 47 | H  | 2.606  | 1.128  | -5.441 |
| 48 | N  | 2.022  | 0.777  | -1.660 |
| 49 | I  | 2.321  | 2.248  | 5.968  |
| 50 | I  | 1.922  | -1.905 | -5.003 |

Dimers: **2.6** [t-PtBr<sub>2</sub>(NC<sub>5</sub>H<sub>4</sub>I)<sub>2</sub>]<sub>2</sub>

| Index | Atom type | x      | y      | z      |
|-------|-----------|--------|--------|--------|
| 1     | C         | -1.875 | -0.793 | -4.591 |
| 2     | C         | -1.966 | -1.084 | -3.244 |
| 3     | C         | -1.200 | 1.026  | -2.684 |
| 4     | C         | -1.072 | 1.367  | -4.013 |
| 5     | C         | -1.418 | 0.452  | -4.990 |
| 6     | H         | -2.298 | -2.046 | -2.885 |
| 7     | H         | -0.951 | 1.712  | -1.886 |
| 8     | H         | -0.708 | 2.350  | -4.273 |
| 9     | H         | -1.333 | 0.700  | -6.038 |
| 10    | Pt        | -1.881 | -0.567 | -0.340 |
| 11    | Br        | -0.423 | -2.546 | -0.513 |
| 12    | Br        | -3.519 | 1.253  | -0.246 |
| 13    | N         | -1.642 | -0.182 | -2.312 |

|    |    |        |        |        |
|----|----|--------|--------|--------|
| 14 | C  | -1.922 | 0.235  | 2.462  |
| 15 | C  | -2.436 | -2.003 | 2.194  |
| 16 | C  | -2.116 | 0.146  | 3.827  |
| 17 | H  | -1.626 | 1.157  | 1.983  |
| 18 | C  | -2.640 | -2.154 | 3.550  |
| 19 | H  | -2.542 | -2.825 | 1.504  |
| 20 | C  | -2.486 | -1.064 | 4.387  |
| 21 | H  | -2.928 | -3.119 | 3.939  |
| 22 | H  | -2.652 | -1.156 | 5.451  |
| 23 | N  | -2.090 | -0.826 | 1.662  |
| 24 | I  | -1.863 | 1.854  | 5.000  |
| 25 | I  | -2.424 | -2.244 | -5.988 |
| 26 | C  | 1.200  | -1.026 | 2.684  |
| 27 | C  | 1.072  | -1.367 | 4.013  |
| 28 | C  | 1.418  | -0.452 | 4.990  |
| 29 | C  | 1.875  | 0.793  | 4.591  |
| 30 | C  | 1.966  | 1.084  | 3.244  |
| 31 | H  | 0.951  | -1.712 | 1.886  |
| 32 | H  | 0.708  | -2.350 | 4.273  |
| 33 | H  | 1.333  | -0.700 | 6.038  |
| 34 | H  | 2.298  | 2.046  | 2.885  |
| 35 | N  | 1.642  | 0.182  | 2.312  |
| 36 | Pt | 1.881  | 0.567  | 0.340  |
| 37 | Br | 0.423  | 2.546  | 0.513  |
| 38 | Br | 3.519  | -1.253 | 0.246  |
| 39 | C  | 1.922  | -0.235 | -2.462 |
| 40 | C  | 2.436  | 2.003  | -2.194 |
| 41 | C  | 2.116  | -0.146 | -3.827 |
| 42 | H  | 1.626  | -1.157 | -1.983 |
| 43 | C  | 2.640  | 2.154  | -3.550 |
| 44 | H  | 2.542  | 2.825  | -1.504 |
| 45 | C  | 2.486  | 1.064  | -4.387 |
| 46 | H  | 2.928  | 3.119  | -3.939 |
| 47 | H  | 2.652  | 1.156  | -5.451 |
| 48 | N  | 2.090  | 0.826  | -1.662 |
| 49 | I  | 2.424  | 2.244  | 5.988  |
| 50 | I  | 1.863  | -1.854 | -5.000 |

Dimers: **2.7** [t-PtCl<sub>2</sub>(N<sub>2</sub>C<sub>4</sub>H<sub>3</sub>I)<sub>2</sub>]<sub>2</sub>

| Index | Atom type | <i>x</i> | <i>y</i> | <i>z</i> |
|-------|-----------|----------|----------|----------|
| 1     | N         | -0.346   | 2.612    | 2.202    |
| 2     | C         | -1.482   | 3.000    | 2.743    |
| 3     | C         | -2.701   | 2.981    | 2.077    |
| 4     | C         | -1.485   | 2.098    | 0.249    |
| 5     | H         | -1.402   | 3.356    | 3.760    |
| 6     | H         | -3.602   | 3.328    | 2.562    |
| 7     | H         | -1.394   | 1.706    | -0.754   |
| 8     | N         | -0.365   | 2.163    | 0.966    |
| 9     | Pt        | 1.396    | 1.651    | 0.136    |

|    |    |        |        |        |
|----|----|--------|--------|--------|
| 10 | C  | 4.293  | 1.508  | -0.090 |
| 11 | N  | 3.151  | 0.624  | -1.900 |
| 12 | H  | 4.182  | 1.932  | 0.895  |
| 13 | C  | 4.306  | 0.394  | -2.491 |
| 14 | C  | 5.539  | 0.712  | -1.935 |
| 15 | H  | 4.233  | -0.071 | -3.464 |
| 16 | H  | 6.456  | 0.504  | -2.466 |
| 17 | N  | 3.160  | 1.193  | -0.714 |
| 18 | I  | -4.424 | 2.451  | -0.373 |
| 19 | I  | 7.273  | 1.765  | 0.337  |
| 20 | C  | -2.695 | 2.516  | 0.786  |
| 21 | C  | 5.525  | 1.278  | -0.684 |
| 22 | Cl | 2.014  | 0.424  | 2.010  |
| 23 | Cl | 0.880  | 2.966  | -1.697 |
| 24 | N  | -3.160 | -1.193 | 0.714  |
| 25 | I  | 4.424  | -2.451 | 0.373  |
| 26 | C  | 1.485  | -2.098 | -0.249 |
| 27 | N  | 0.346  | -2.612 | -2.202 |
| 28 | C  | 1.482  | -3.000 | -2.743 |
| 29 | C  | 2.701  | -2.981 | -2.077 |
| 30 | H  | 1.394  | -1.706 | 0.754  |
| 31 | H  | 1.402  | -3.356 | -3.760 |
| 32 | H  | 3.602  | -3.328 | -2.562 |
| 33 | Pt | -1.396 | -1.651 | -0.136 |
| 34 | N  | 0.365  | -2.163 | -0.966 |
| 35 | C  | -4.293 | -1.508 | 0.090  |
| 36 | N  | -3.151 | -0.624 | 1.900  |
| 37 | H  | -4.182 | -1.932 | -0.895 |
| 38 | C  | -4.306 | -0.394 | 2.491  |
| 39 | C  | -5.539 | -0.712 | 1.935  |
| 40 | H  | -4.233 | 0.071  | 3.464  |
| 41 | H  | -6.456 | -0.504 | 2.466  |
| 42 | I  | -7.273 | -1.765 | -0.337 |
| 43 | C  | 2.695  | -2.516 | -0.786 |
| 44 | C  | -5.525 | -1.278 | 0.684  |
| 45 | Cl | -2.014 | -0.424 | -2.010 |
| 46 | Cl | -0.880 | -2.966 | 1.697  |

Dimers: **2.8** [t-PtCl<sub>2</sub>(N<sub>2</sub>C<sub>3</sub>H<sub>3</sub>Br)<sub>2</sub>]<sub>2</sub>

| Index | Atom type | <i>x</i> | <i>y</i> | <i>z</i> |
|-------|-----------|----------|----------|----------|
| 1     | C         | -1.100   | -2.065   | -3.916   |
| 2     | C         | -1.227   | -2.008   | -5.264   |
| 3     | C         | -2.168   | -0.226   | -4.348   |
| 4     | H         | -0.661   | -2.823   | -3.295   |
| 5     | H         | -0.915   | -2.671   | -6.049   |
| 6     | H         | -2.666   | 0.722    | -4.249   |
| 7     | N         | -1.686   | -0.951   | -3.362   |
| 8     | Pt        | -1.760   | -0.468   | -1.396   |
| 9     | Cl        | -1.713   | 1.790    | -1.989   |

|    |    |        |        |        |
|----|----|--------|--------|--------|
| 10 | Cl | -1.838 | -2.728 | -0.883 |
| 11 | Br | -2.365 | -0.197 | -7.163 |
| 12 | C  | -1.520 | -0.820 | 1.563  |
| 13 | C  | -2.099 | 1.230  | 1.137  |
| 14 | H  | -1.222 | -1.847 | 1.461  |
| 15 | C  | -2.001 | 1.135  | 2.484  |
| 16 | H  | -2.339 | 2.079  | 0.526  |
| 17 | H  | -2.149 | 1.847  | 3.272  |
| 18 | N  | -1.806 | 0.007  | 0.577  |
| 19 | Br | -1.341 | -0.907 | 4.372  |
| 20 | N  | -1.909 | -0.841 | -5.515 |
| 21 | N  | -1.638 | -0.169 | 2.729  |
| 22 | N  | 1.806  | -0.007 | -0.577 |
| 23 | C  | 2.168  | 0.226  | 4.348  |
| 24 | C  | 1.100  | 2.065  | 3.916  |
| 25 | C  | 1.227  | 2.008  | 5.264  |
| 26 | H  | 2.666  | -0.722 | 4.249  |
| 27 | H  | 0.661  | 2.823  | 3.295  |
| 28 | H  | 0.915  | 2.671  | 6.049  |
| 29 | Pt | 1.760  | 0.468  | 1.396  |
| 30 | Cl | 1.713  | -1.790 | 1.989  |
| 31 | Cl | 1.838  | 2.728  | 0.883  |
| 32 | Br | 2.365  | 0.197  | 7.163  |
| 33 | N  | 1.686  | 0.951  | 3.362  |
| 34 | C  | 1.520  | 0.820  | -1.563 |
| 35 | C  | 2.099  | -1.230 | -1.137 |
| 36 | H  | 1.222  | 1.847  | -1.461 |
| 37 | C  | 2.001  | -1.135 | -2.484 |
| 38 | H  | 2.339  | -2.079 | -0.526 |
| 39 | H  | 2.149  | -1.847 | -3.272 |
| 40 | Br | 1.341  | 0.907  | -4.372 |
| 41 | N  | 1.909  | 0.841  | 5.515  |
| 42 | N  | 1.638  | 0.169  | -2.729 |

- 1 © 2019 by the authors. Submitted to *Materials* for possible open access publication under the terms and conditions
- 2 of the Creative Commons Attribution (CC BY) license (<http://creativecommons.org/licenses/by/4.0/>).
